1 **Current range of *Agrilus planipennis* Fairmaire, an alien pest of ash trees, in European Russia and Ukraine**

2

3

4 Marina J. ORLOVA-BIENKOWSKAJA<sup>1\*</sup>, Alexander N. DROGVALENKO<sup>2</sup>, Ilya A. ZABALUEV<sup>1</sup>, Alexey S.  
5 SAZHNEV<sup>3</sup>, Elena Y. PEREGUDOVA<sup>4</sup>, Sergey G. MAZUROV<sup>5</sup>, Evgenij V. KOMAROV<sup>6</sup>, Vitalij V.  
6 STRUCHAEV<sup>7</sup>, Vladimir V. MARTYNOV<sup>8</sup>, Tatyana V. NIKULINA<sup>8</sup>, Andrzej O. BIENKOWSKI<sup>1</sup>

7 \* Corresponding author

8

9 <sup>1</sup> A.N. Severtsov Institute of Ecology and Evolution, Russian Academy of Sciences, 33 Leninskiy Prospect,  
10 Moscow, Russia 119071

11 <sup>2</sup> V.N. Karazin Kharkiv National University, 4 Svobody Square, Kharkiv, Ukraine 61022

12 <sup>3</sup> Papanin Institute for Biology of Inland Waters, Russian Academy of Sciences, Borok, Nekouz District, Yaroslavl  
13 Region, Russia 152742

14 <sup>4</sup> Saint Petersburg State Forest Technical University, Institutskiy per., 5, Saint Petersburg, Russia 194021

15 <sup>5</sup> Middle School of General education, Leski, Krasnoe District, Lipetsk Region, Russia 399675

16 <sup>6</sup> All-Russian Scientific Research Institute of Irrigated Agriculture, Timiryazev str., 9, Volgograd Russia 400002

17 <sup>7</sup> Agrobiotekhnologia, Kolkhoznaya Street 3/1, Churayev, Shebekino District, Belgorod Region, Russia 309251

18 <sup>8</sup> Public Institution "Donetsk Botanical Garden", 110 Illicha Prospect, Donetsk, Donetsk People's Republic 283059

19

20 **Email address**

21 Marina J. Orlova-Bienkowskaja

22 e-mail: marinaorlben@yandex.ru

23

24 Alexander N. Drogvalenko

25 e-mail: triplaxxx@ukr.net

26

27 Ilya A. Zabaluev

28 e-mail: fatsiccor66@mail.ru

29

30 Alexey S. Sazhnev

31 e-mail: sazh@list.ru

32

33 Elena Y. Peregudova

34 e-mail: dinamo-l@mail.ru

35

36 Sergey G. Mazurov

37 e-mail: mazusergej@yandex.ru

38

39 Evgenij V. Komarov

40 e-mail: evkomarov@rambler.ru

41

42 Vitalij V. Struchaev

43 e-mail: vivastru@mail.ru

44

45 Vladimir V. Martynov  
46 e-mail: [martynov.scarab@yandex.ua](mailto:martynov.scarab@yandex.ua)

47  
48 Tatyana V. Nikulina  
49 e-mail: [nikulinatanya@mail.ru](mailto:nikulinatanya@mail.ru)

50  
51 Andrzej O. Bieńkowski  
52 e-mail: [bienkowski@yandex.ru](mailto:bienkowski@yandex.ru)

53  
54 **Short title**  
55 *Agrilus planipennis* range in Europe in 2020

56  
57 **Keywords**  
58 Emerald Ash Borer; EAB; *Fraxinus pennsylvanica*; *Fraxinus excelsior*; invasive pest; ash

59  
60 **Contributions of the co-authors**  
61 Conceptualization: M.O.B.; Investigation: M.O.B., A.D., I.Z., A.S., E.P., S.M., E.K., V.S., V.M., T.N., A.B.;  
62 Writing – original draft M.O.B., A.B.; Writing – review & editing: M.O.B., A.B.; Funding acquisition M.O.B.

63  
64 **Acknowledgments**  
65 We thank A.B. Ruchin from Mordovski Nature Reserve, L.V. Egorov from Prisurski Nature Reserve, A.N.  
66 Volodchenko from Saratov State University, A.A. Bieńkowski from Moscow State University, R.N. Ishin from  
67 Tambov State University, P.A. Zavalishin from Saint Petersburg State Forest Technical University and V.V. Anikin  
68 and M.V. Lavrentiev from Saratov State University for the information about the surveys of ash trees in different  
69 regions of European Russia and Belarus and S.A. Bieńkowski for the preparation of the maps and photos.

70  
71 **Funding**  
72 This study was funded by Science Foundation, Project (grant number 16-14-10031).

73  
74  
75 **Key message**  
76 The emerald ash borer (*Agrilus planipennis* Fairmaire), an alien pest native to Asia, has spread to Ukraine and 16  
77 regions of European Russia. It severely damages *Fraxinus pennsylvanica* Marsh. introduced from North America,  
78 but serious damage to European ash (*Fraxinus excelsior* L.) has not been detected in forests.

79  
80 **Abstract**  
81 **Context:**  
82 The first detection of *A. planipennis* in European Russia was in Moscow in 2003, when it began to spread.

83 **Aim:**  
84 To determine the range of *A. planipennis* as of 2020.

85 **Methods:**  
86 In 2017-2020, our Russian-Ukrainian research team examined >7000 *F. pennsylvanica* trees and >2500 *F. excelsior*  
87 trees in 84 localities of European Russia, Ukraine and Belarus.

88 **Results:**  
89 The current range exceeds the area of Spain and includes the Luhansk region of Ukraine and 16 regions of ER:  
90 Belgorod, Bryansk, Kaluga, Kursk, Lipetsk, Moscow, Orel, Ryazan, Smolensk, Tambov, Tula, Tver, Vladimir,

91 Volgograd, Voronezh, and Yaroslavl. *Agrilus planipennis* was not detected in Belarus. The overwhelming majority  
92 of the infestations were found on *F. pennsylvanica*. All known cases of infestation of the native species (*F.*  
93 *excelsior*) are from artificial plantings.

#### 94 **Conclusion**

95 *Agrilus planipennis* will appear in other European countries soon and damage *F. pennsylvanica*. Further surveys are  
96 necessary to determine whether *A. planipennis* infests *F. excelsior* in forests.

97

98 **Keywords:** Emerald ash borer; EAB; *Fraxinus pennsylvanica*; *Fraxinus excelsior*; invasive pest; ash

99

## 100 **1. Introduction**

101 The emerald ash borer, *Agrilus planipennis* Fairmaire (Coleoptera: Buprestidae), is a devastating alien pest of ash  
102 trees in European Russia and North America (Baranchikov et al. 2008; Herms and McCullough 2014; Haack et al.  
103 2015). It is included in the list of 20 priority quarantine pests of the EU (EU 2019). The native range of this wood-  
104 boring beetle occupies a restricted territory in East Asia (Orlova-Bienkowskaja and Volkovitsh 2018). In 2003, *A.*  
105 *planipennis* was first recorded in European Russia, namely, in Moscow, and a severe outbreak and quick spread of  
106 the pest began (Baranchikov et al. 2008; Haack et al. 2015). By 2013, the pest was recorded in 9 regions of  
107 European Russia: from Yaroslavl in the north to Voronezh in the south (Straw et al. 2013; Orlova-Bienkowskaja  
108 2014a). A probabilistic model of spread made in 2017 showed that in the next few years, the range of *A. planipennis*  
109 in Europe could expand significantly, and the pest could appear in neighboring countries (Orlova-Bienkowskaja and  
110 Bieńkowski 2018a).

111 *Fraxinus pennsylvanica* Marsh. was introduced from North America and is widely planted in European  
112 Russia as an ornamental and landscape tree. It is highly susceptible to *A. planipennis* both in North America and  
113 Russia (Herms and McCullough 2014; Baranchikov et al. 2014). The overwhelming majority of detected  
114 infestations of ash trees in European Russia correspond to this North American ash species (Baranchikov et al. 2008;  
115 Straw et al. 2013; Orlova-Bienkowskaja 2014a, etc.).

116 The only native ash species in European Russia is *F. excelsior* L. It is susceptible to the pest (Baranchikov  
117 et al. 2014). However, it is still unknown whether it is highly susceptible (as are the ash species native to North  
118 America) or less susceptible (as are the ash species native to Asia). On the one hand, the only cultivar of *F. excelsior*  
119 tested in a naturally infested experiment in America, cv. *Aureafolia*, had similar long-term mortality as that of *F.*  
120 *nigra* and *F. pennsylvanica* (Herms 2015). On the other hand, current experiments have shown that saplings of *F.*  
121 *excelsior* are much less susceptible than *F. nigra* Marsh. to *A. planipennis* (Showalter et al. 2019). *Fraxinus*  
122 *excelsior* is rare in the Moscow region and other regions of northern and central Russia. Therefore, information  
123 about the infestation of *F. excelsior* by *A. planipennis* is scarce and refers only to urban plantings and artificial  
124 shelterbelts, where *F. excelsior* is planted together with *F. pennsylvanica* (Straw et al. 2013; Baranchikov 2018).  
125 There is no information about the impact of *A. planipennis* on *F. excelsior* in natural forests. Therefore, there is a  
126 great deal of uncertainty surrounding the likely future impact of *A. planipennis* on ash in European forests (Straw et  
127 al. 2013).

128 The main aim of our study was to determine the range of *A. planipennis* in Europe as of 2020. An  
129 additional aim was to obtain information about the current condition of *F. excelsior* in natural forest stands in some  
130 regions occupied by *A. planipennis*.

131

## 132 **2. Material and methods**

133 2.1. Collation of previous records of *A. planipennis*

134 We have studied the *A. planipennis* range in European Russia since 2013 and have carefully examined all records  
135 that have appeared in journal articles, conference papers, official quarantine documents and other sources. These  
136 records, which comprise all of the published data on localities where *A. planipennis* has been detected, are compiled  
137 in Table 1.

138 2.2. Localities of the survey

139 In 2017, 2018 and 2019, we examined more than 7000 green ash trees (*F. pennsylvanica*) and more than 2500  
140 European ash trees (*F. excelsior*) in 84 localities of European Russia, Belarus and Ukraine (Table 2, Figs 1, 2).

- 141 1. We examined ash trees in 7 Russian cities, where *A. planipennis* was found 4-16 years ago. The aim was to  
142 determine whether ash trees and populations of *A. planipennis* still existed there.
- 143 2. We examined ash trees in localities where *A. planipennis* had not been reported before. The aim was to  
144 determine the current range of the pest in Europe. We selected particular survey areas so that they were situated  
145 in all directions from the previously known range of *A. planipennis* in Europe. If we found the pest outside the  
146 previously known range, we conducted the next survey in a locality situated further in the same direction. We  
147 repeated this procedure until we found localities without the pest. This protocol was flexible since we used all  
148 possibilities to examine as many localities as possible.
- 149 3. We examined more than 500 *F. excelsior* in two localities in a large natural forest, Tulskie Zaseki, situated in  
150 the center of the current range of *A. planipennis* in European Russia. The aim was to determine whether there  
151 were trees infested with *A. planipennis* in this forest.

152  
153 2.3. Method of survey

154 The survey of ash trees in each city always started from the main railway station. Usually, we stayed one day in each  
155 city and examined as many ash trees as we could. In most localities we examined artificial plantings in cities, along  
156 motorways and railroads and in shelterbelts. The survey of 500 *F. excelsior* trees in the large Tulskie Zaseki Forest  
157 was conducted in two localities situated 25 km apart (see Table 2).

158 We used the standard method of *A. planipennis* detection used by many authors (Baranchikov and Kurteev  
159 2012; Straw et al. 2013, etc.). We looked for ash trees with symptoms of general decline (dieback of the upper part  
160 of the stem, reduced foliage, epicormic shoots, loose bark, etc.) (Fig. 3) and examined the lower part of the stem,  
161 below 2 m, for the presence of D-shaped exit holes of *A. planipennis* on the bark surface and larval galleries under  
162 the bark in the cambial region at the inner bark-sapwood interface (Figs 4, 5). If we found exit holes and larval  
163 galleries, we took photos and tried to collect larvae from under the bark and adults (live specimens on leaves or dead  
164 specimens in their exit holes). The larvae and adults were examined in the laboratory to confirm their identification  
165 and deposited in the authors' collections. The following guides were used for identification: Chamorro et al. (2012)  
166 and Volkovitsh et al. (2019). The map was made with ArcView GIS 10.4.1 (Esri) in A.N. Severtsov Institute of  
167 Ecology and Evolution, Russian Academy of Sciences, Moscow (Esri Customer Number 282718).

168  
169 **3. Results**

170  
171 3.1. European Russia

172 3.1.1. Localities with previous detections of *A. planipennis*

173 In 2019, we examined ash trees in 7 cities where *A. planipennis* was found 4-16 years ago: Moscow (first record in  
174 2003), Kolomna (2012), Zelenograd (2011), Vyazma (2012), Tula (2013), Tver (2015) and Zubtsov (2013) (see  
175 Table 1 for information about the first records). The overwhelming majority of ash trees in these localities were *F.*  
176 *pennsylvanica*, which is one of the most common trees planted in the cities of European Russia. *Fraxinus excelsior*  
177 also occurred sometimes but much more rarely. In all these localities, ash trees were still common, and populations  
178 of *A. planipennis* still existed. Larvae or adults were found in all these localities in 2019.

179 Moscow was the entry point of invasion of *A. planipennis* in European Russia. By 2013, most ash trees in  
180 the city were heavily damaged (Orlova-Bienkowskaja 2014b), and some experts believed that ash trees would  
181 disappear throughout the city (Mozolevskaya 2012). However, surveys in 18 districts of Moscow in 2016 and 2017  
182 showed that *F. pennsylvanica* was still common in the city, and *A. planipennis* had become rare (Orlova-  
183 Bienkowskaja and Bieńkowski 2018b). The survey in 2018 and 2019 confirmed this result. The reason for the  
184 decline in *A. planipennis* population in Moscow is unknown. It could be the result of mortality caused by the  
185 European parasitoid of *A. planipennis* *Spathius polonicus* Niezabitowski, 1910 (Hymenoptera: Braconidae:  
186 Doryctinae) (Orlova-Bienkowskaja and Belokobylskij 2014).

187 Infestations were found in all cities of the Moscow region surveyed by us in 2017-2019 (Table 2). In  
188 particular, a severe outbreak was recorded in 2019 in the city of Shakhovskaya. Almost all ash trees in the city were  
189 heavily infested. On 16 July 2019, more than 100 *A. planipennis* adults and larvae were collected there.

190

#### 191 3.1.2. Western regions: Tver, Pskov, Smolensk regions and St-Petersburg

192 We tried to find *A. planipennis* in 10 new localities of European Russia situated west and northwest of the border of  
193 the previously known range as of 2016: the Pskov region (Sebez and Velikie Luki), Smolensk region (Roslavl and  
194 Sychevka), Tver region (Bologoye, Ostashkov, Rzev, Torzhok, and Vyshniy Volochek) and St. Petersburg.  
195 However, we detected no signs of the infestation with *A. planipennis* in these localities. It is interesting that we  
196 failed to find *A. planipennis* even in the city of Rhev, which is only 15 km northwest of Zubtsov, where an outbreak  
197 of *A. planipennis* was detected in 2013 (Straw et al. 2013) and is still continuing (based on our observations in  
198 2019).

#### 199 3.1.3. Volgograd Region

200 In a planting of declining *F. pennsylvanica* trees (105 ha) on Sarpinsky Island in the Volga River (near the city of  
201 Volgograd) in October 2018 the trees were severely damaged by *A. planipennis*. The island is occupied by a  
202 floodplain forest, initially consisting of *Quercus*, *Populus*, and *Ulmus* trees, which was later replaced by an  
203 adventive plant: *F. pennsylvanica*. In different parts of the island, the infestation of ash trees varied from 20-30% to  
204 90-100%. The decline in the ash plantings because of *A. planipennis* outbreak attracted the attention of the local  
205 television company (Vesti Volgograd 2018). In 2019, infested trees were also detected on the left bank of the Volga  
206 River, in the Volga-Akhtuba floodplain, on the Sarepta Peninsula and in the center of Volgograd city (Mira Street).

207

#### 208 3.1.4. Kursk region

209 In 2014, we surveyed more than 100 *F. pennsylvanica* trees in Kursk city near the main railway station and did not  
210 find evidence of *A. planipennis* (Orlova-Bienkowskaja and Bieńkowski, unpublished data). In 2016, the survey in  
211 Kursk was repeated by an expert from the All-Russian Center of Plant Quarantine, Y.N. Kovalenko, and he also did  
212 not find *A. planipennis* (unpublished data). In 2019, we examined more than 100 *F. pennsylvanica* trees in plantings

213 along the railway near the main railway station in Kursk and found that at least half of the trees had *A. planipennis*  
214 exit holes. One dead adult specimen was collected in its exit hole. Additional examinations of *F. pennsylvanica* trees  
215 in the parks of Boeva Dacha and Pyatidesyatiletija VLKSM showed that many trees were in poor condition and had  
216 *A. planipennis* exit holes.

217

#### 218 3.1.5. Lipetsk region

219 The Lipetsk region is surrounded by the Tula, Orel, Ryazan, Voronezh and Tambov regions, where *A. planipennis*  
220 was found in 2013 (Orlova-Bienkowskaja 2014a), but M.J. Orlova-Bienkowskaja did not find any trees infested  
221 with *A. planipennis* in the city of Gryazy in the Lipetsk region in 2013. However, many *F. pennsylvanica* trees were  
222 in poor condition, and the species *Agrilus convexicollis* Redtenbacher, which is often associated with *A. planipennis*,  
223 was found (Orlova-Bienkowskaja and Volkovitsh 2014). In 2018, *A. planipennis* was first found in the Lipetsk  
224 region in the city of Elets (Baranchikov 2018). On 22 June 2019, we collected one adult *A. planipennis*  
225 approximately 40 km from Elets in plantings of *F. pennsylvanica* along the railway in Leski, Lipetsk region.  
226 Examination of 10 trees in this planting did not reveal exit holes, but all the trees of *A. planipennis* were in poor  
227 condition and had dieback in the upper canopy.

#### 228 3.1.6. Voronezh region

229 *Agrilus planipennis* was first detected in the Voronezh region in 2013 in the city of Voronezh (Orlova-Bienkowskaja  
230 2014a). In 2018, it was detected in other localities: in the very south of the region (50°12'N, exact location is not  
231 known) and in the city of Talovaya (Baranchikov et al. 2018a), as well as in Olkhovatskoe Lesnichestvo  
232 (Rosselkhoznadzor 2019). In 2019, we surveyed ash trees in four other localities of the Voronezh region. *Agrilus*  
233 *planipennis* was not found in the northeast of the region (Borisoglebsk and Povorino), but was found in the  
234 following areas in the center and south of the region:

235 1. Rossosh. More than 100 heavily infested *F. pennsylvanica* trees with larval galleries and exit holes were found in  
236 a shelterbelt around the Chkalovskij district (50.201158 N, 39.604695 E). One *F. pennsylvanica* and one *F.*  
237 *excelsior* with exit holes and larval galleries were found near the main railway station (50.184266 N, 39.600577 E).

238 2. Kantemirovka. One *F. pennsylvanica* with *A. planipennis* exit holes and larval galleries was found in the territory  
239 of the House of Culture (49.698968 N, 39.860308 E). Trees of *F. pennsylvanica* with *A. planipennis* exit holes and  
240 larval galleries were also found near a gas station on the R-194 road (49.758194 N, 39.843341 E).

#### 241 3.1.7. Belgorod region

242 *Agrilus planipennis* was first detected in the Belgorod region in May 2019 in several localities close to the Voronezh  
243 region and the border of Ukraine (Baranchikov and Seraya 2019). Our surveys of ash trees in the cities of Belgorod  
244 and Saryi Oskol in summer 2019 did not reveal *A. planipennis*. In January 2020 larval galleries and larvae were  
245 found in the north-east of the Belgorod region (Table 2).

#### 246 3.1.8. Kaluga region

247 *Agrilus planipennis* was first detected in the Kaluga region in Obninsk city in 2012 and in Kaluga city in 2013  
248 (Orlova-Bienkowskaja 2014a). A survey of more than 100 *F. pennsylvanica* trees in the city of Maloyaroslavets on  
249 31 August 2019 revealed *A. planipennis* exit holes and larval galleries on at least 50 of the trees.

#### 250 3.1.9. Bryansk region

251 The first survey of ash trees in the city of Bryansk was conducted in 2013 and did not reveal signs of infestation by  
252 *A. planipennis* (Orlova-Bienkowskaja 2014a). In 2019, *A. planipennis* was detected in Majsij Park in Bryansk by  
253 the National Plant Protection Organization, and an official phytoquarantine zone was declared there  
254 (Rosselkhoznadzor 2019). On 1 July 2019, we examined ash trees in other districts of Bryansk and found that *F.*  
255 *pennsylvanica* trees in M.P. Kamozin Square and on Krasnoarmejskaya, Ulyaniva and Kharkovskaja streets were  
256 heavily infested with *A. planipennis*.

257 3.1.10. Surveys of *F. excelsior* in the Tulskie Zaseki Forest in the center of the pest range in European  
258 Russia

259 The large broad-leaved Tulskie Zaseki Forest (65 000 ha) is situated in the Tula region in the center of the current  
260 range of *A. planipennis* in European Russia. *Fraxinus excelsior* is one of the main tree species of this forest. In 2013,  
261 *A. planipennis* was detected near this forest, in Tula and Shchekino as well as in the surrounding regions of Kaluga  
262 and Orel (Straw et al. 2013; Orlova-Bienkowskaja 2014a). *Fraxinus pennsylvanica* trees were very common in the  
263 cities of Tula and Shchekino, and almost all of them had been infested by *A. planipennis* (Baranchikov et al. 2018b  
264 and observations by I.A. Zabaluev). On 19-20 June 2019, more than 500 *F. excelsior* trees were examined in the  
265 Tulskie Zaseki Forest in two localities: near Krapivna village and in Severno-Odoevskoe Lesnichestvo. The trees  
266 were situated both along and within the forest. No signs of infestation by *A. planipennis* were found, and the trees  
267 appeared to be in good health.

268

269 3.2. Belarus

270 In 2017-2019, we tried to find *A. planipennis* in the eastern and central regions of Belarus in the cities of Borisov,  
271 Stolbtsy, Mogilev, Orsha, Vitebsk, Minsk, Krichev and Gomel. We did not find any signs of infestations despite *F.*  
272 *pennsylvanica* and *F. excelsior* being commonly planted in these cities (Table 2).

273 3.3. Ukraine

274 On 20-22 June 2019, ash trees in Starokozhiv Forest and field shelterbelts in its vicinity were examined (in the  
275 Markivka district of the Luhansk region of Ukraine). The forest consisted of *Acer platanoides* L., *F. excelsior*, *Pyrus*  
276 sp. and *Quercus* sp. The undergrowth and edges consisted of *Acer campestre* L., *Acer tataricum* L., *Fraxinus*  
277 *excelsior*, *F. pennsylvanica*, *Prunus fruticosa* Pallas. and *P. spinosa* L. The shelterbelts consisted mainly of *F.*  
278 *pennsylvanica*. During the examination of 250 ash trees, three *F. pennsylvanica* trees damaged by *A. planipennis*  
279 were detected. These trees were situated at the edge of the shelterbelts and had diameters of 7-10 cm. Characteristic  
280 D-shaped exit holes were situated at a height of 50-200 cm above the groundline. The infested trees had dieback of  
281 the upper branches, and foliage density was reduced (i.e., the trees had fewer and smaller leaves).

282 On 2 July 2019, we posted an early version of this manuscript on the Internet as a preprint (Orlova-  
283 Bienkowskaja et al. 2019). Immediately following the appearance of this preprint on the Internet, the National Plant  
284 Protection Organization of Ukraine conducted an official survey in the same area and did not detect *A. planipennis*.  
285 Since there were no specimens or photos for confirmation, our record of *A. planipennis* in Ukraine was considered  
286 unreliable (EPPO 2019a).

287 On September 4-6 2019, A.N. Drogvalenko visited the Markivka district in the Luhansk region of Ukraine  
288 again and repeated his survey of ash trees. He found the same three trees and more than 40 other *F. pennsylvanica*  
289 trees that were heavily infested with *A. planipennis*, took photos of larvae, larval galleries (Fig. 4) and exit holes and  
290 collected more than 20 larvae of different instars, including the last (4<sup>th</sup>) instar. The coordinates of these trees, from

291 which the larvae were collected, are as follows: 49.614991 N, 39.559743 E; 49.614160 N, 39.572402 E; and  
292 49.597043 N, 39.561811 E (roadside planting). The larvae were deposited in a collection in Kharkiv, Ukraine by  
293 A.N. Drogvalenko (Drogvalenko et al. 2019). After that, the presence of *A. planipennis* was also confirmed by the  
294 Ukrainian NPPO (EPPO 2019b). On October 22 2019, *A. planipennis* was found within 2 km radius from initial  
295 observation point outside the established quarantine zone (Meshkova 2019).

296 Our survey of ash trees in other localities of Ukraine (Luhansk region, Donetsk region and Kharkiv city)  
297 did not reveal any *A. planipennis* infestations despite both *F. pennsylvanica* and *F. excelsior* being usual in these  
298 regions and occurring in both natural forests and in plantings (shelterbelts and along roads) (Table 2, Fig. 2).

## 299 4. Discussion

### 300 4.1. Current borders of *A. planipennis* range in Europe

301 Previously published records (Table 1) and our surveys in 2017-2020 (Table 2) indicate that by 2020, *A. planipennis*  
302 occurred in the Luhansk region of Ukraine and in at least 16 regions of European Russia: Belgorod, Bryansk,  
303 Kaluga, Kursk, Lipetsk, Moscow, Orel, Ryazan, Smolensk, Tambov, Tula, Tver, Vladimir, Volgograd, Voronezh,  
304 and Yaroslavl (Fig. 1). It should be noted that these results were obtained by simple surveys of ash trees without the  
305 use of pheromone traps. Usually, the signs of *A. planipennis* become visible only several years after the  
306 establishment of this pest in a region (Haack et al. 2015). Therefore, the real range of *A. planipennis* in Europe  
307 could be even more extensive.

308 The westernmost known *A. planipennis* localities are in Semirechje (Zvyagintsev et al. 2015) and Smolensk  
309 city (Baranchikov and Seraya 2018) in the Smolensk region. In the northwest, the border of the range is near  
310 Zubtsov and Tver in the Tver region. The northernmost locality is Yaroslavl. The eastern border of the range in  
311 European Russia is poorly known. The extreme localities in this direction are Yaroslavl, Petushki (Vladimir region),  
312 Vysokoe (Ryazan region), Michurinsk (Tambov region) and Volgograd. However, it is unknown if this is the true  
313 eastern border of the range, since few surveys were conducted further east of these localities. The most eastern and  
314 the most southern known locality was Volgograd. In the southwest, the known border crossed the Bryansk, Kursk,  
315 Belgorod and Voronezh regions of Russia and the Luhansk region of Ukraine. In the southwest, the border of *A.*  
316 *planipennis* known range almost coincided with the Russian-Ukrainian border. Therefore, it is quite possible that *A.*  
317 *planipennis* will soon be found on the other side of the state border, in the Chernihiv, Sumy and Kharkiv regions of  
318 Ukraine.

### 319 4.2. Dynamics of the range since 2013

320 The northern and northwestern borders of *A. planipennis* range in European Russia in 2019 were almost the  
321 same as those in 2013. The northernmost locality–Yaroslavl–is at a latitude of 57.63 N, i.e., much further north than  
322 the northernmost locality of *A. planipennis* in North America (47.31 N) (Emerald Ash Borer Info 2019) and in Asia  
323 (49.42 N) (Orlova-Bienkowskaja and Volkovitsh 2018). Therefore, it is unknown whether *A. planipennis* can spread  
324 further north to St. Petersburg and northern Europe or if it has already reached its potential border in the north. To  
325 answer this question, an ecological model of the potential range of *A. planipennis* in Europe should be created,  
326 taking into account that the generation time in Moscow is 2 years (Orlova-Bienkowskaja and Bieńkowski 2016).

327 In the south, the situation is much worse. *Agrilus planipennis* is quickly spreading. It has now appeared in  
328 Ukraine and in the nearby areas of European Russia, such as the Volgograd, Bryansk, Kursk, Belgorod regions and  
329 the south of the Voronezh region.



330 4.3. Perspectives for European forestry

331 The distance from Moscow to Volgograd is more than 900 km, which is more than the distance from Moscow to  
332 Lithuania, Latvia and Estonia. Obviously, the pest can be detected in any part of Eastern Europe. In addition, *A.*  
333 *planipennis* could soon appear in Kazakhstan, given that the distance between Volgograd and the border of  
334 Kazakhstan is approximately 150 km.

335 Since there are no infested *F. excelsior* trees in the large Tulske Zaseki Forest in European Russia, it seems  
336 that *F. excelsior* could be more resistant to the pest than ash species native to North America are, at least in natural  
337 forest stands. All cases of infestation of *F. excelsior* in Russia correspond to trees that grew near plantings of *F.*  
338 *pennsylvanica*. *Fraxinus pennsylvanica* is highly susceptible to *A. planipennis* and trees of this species are a source  
339 for the outbreak of the pest, which can also attack *F. excelsior* trees growing nearby. A similar situation was  
340 observed in China; in 1964, plantings of *Fraxinus americana* L. introduced from North America triggered the  
341 outbreak of *A. planipennis* in Harbin (Liu et al. 2003). The pest damaged both *F. americana* and native ash species  
342 in the region, but after the *F. americana* trees were cut, the outbreak ended.

343 *Agrilus planipennis* has not yet become a major forest pest in European Russia or Ukraine. It occurs in  
344 artificial plantings, such as urban plantings, along roads, railroads and in shelterbelts. The overwhelming majority of  
345 infested and dead trees are *F. pennsylvanica*. The only ash species native to European Russia, *F. excelsior*, is also  
346 susceptible to *A. planipennis*, but there is still no evidence of the widespread mortality of this ash species in  
347 European forests. There is no doubt that *A. planipennis* will severely damage plantings of *F. pennsylvanica* in  
348 Europe. However, the prognosis for the future of *F. excelsior* in European forests is still uncertain.

349 **5. Conclusion**

350 In just 16 years, following the first record in Europe, *A. planipennis* has spread over an area of 600 000 km<sup>2</sup> (i.e., its  
351 current range exceeds the area of Spain). The range includes 16 regions of European Russia and the Luhansk region  
352 of Ukraine. The pest is quickly spreading to the south and will undoubtedly appear in other European countries  
353 soon. No expansion of the range to the north has been detected since 2013. No case of serious *A. planipennis*  
354 damage to *F. excelsior* in European forests has been detected yet. Therefore, it is still unknown whether *A.*  
355 *planipennis* will become a devastating forest pest in Europe or just a pest of urban plantings. An extensive survey of  
356 the European ash (*F. excelsior*) in natural forests is necessary to determine the future possible impact of *A.*  
357 *planipennis* on European forests. We hope that this article will encourage experts from different European countries  
358 to study *A. planipennis* before this pest reaches the EU.

359

360       **References**

- 361 Baranchikov YN (2013) EAB is the leading abbreviation for European forest protection in the first half of this  
362 century. In: Selikhovkin AV, Musolin DL (eds) The Kataev Memorial Readings – 7. Pests and Diseases of  
363 Woody Plants in Russia. Proceedings of the International Conference. Saint Petersburg (Russia),  
364 November, 25–27, 2013. Saint Petersburg State Forest Technical University, Saint Petersburg, pp 8–9 (**in**  
365 **Russian**)
- 366 Baranchikov YN (2018) Preparing for protection of European Forests from invasive species of buprestids. *Sibirskij*  
367 *Lesnoj Zurnal*, 6:126–131 (**in Russian with English abstract**). <https://doi.org/10.15372/SJFS20180612>
- 368 Baranchikov YN, Demidko DA, Seraya LG (2018a) A quarter-century of emerald ash borer in Europe. In: Preparing  
369 Europe for invasion by the beetles emerald ash borer and bronze birch borer, two major tree-killing pests  
370 October 1–4, 2018, Vienna. Austrian Research Centre for Forests (BFW), Abstracts, p 9
- 371 Baranchikov YN, Demidko DA, Seraya LG (2018b) Deep in the rear of the invasion: *Agrilus planipennis*  
372 (Coleoptera: Buprestidae) in Tula. In: Selikhovkin AV, Musolin DL (eds) The Kataev Memorial Readings  
373 – 10. Proceedings of the International Conference. Saint Petersburg (Russia), October, 22–25, 2018. Saint  
374 Petersburg State Forest Technical University, Saint Petersburg, pp 8–9 (**in Russian**)  
375 <https://doi.org/10.21266/SPBFTU.2018.KATAEV.1>.
- 376 Baranchikov YN, Gninenko YI, Yurchenko GI (2010) Emerald ash borer in Russia: 2009 situation update. Proc.  
377 21st USDA Interagency research forum on invasive species. USDA Forest Service, Northern Research  
378 Station: Morgantown, WV. GTR-NRSP-75, pp 66–67
- 379 Baranchikov YN, Kurteev VV (2012) Invasive area of the emerald ash borer in Europe. Ecological and economical  
380 consequences of invasions of dendrophilous insects. Forest Institute of Siberian Branch of Russian  
381 Academy of Sciences, Krasnoyarsk, pp 91–94 (**in Russian**)
- 382 Baranchikov YN, Mozolevskaya EG, Yurchenko GI, Kenis M (2008) Occurrence of the emerald ash borer (*Agrilus*  
383 *planipennis*) in Russia and its potential impact on European forestry. EPPO Bull 38: 233–238
- 384 Baranchikov YN, Seraya LG (2018) Smolensk is occupied by *Agrilus planipennis* (Coleoptera: Buprestidae) ten  
385 years ago. In: Selikhovkin AV, Musolin DL (eds) The Kataev Memorial Readings – 10. Proceedings of the  
386 International Conference. Saint Petersburg (Russia), October, 22–25, 2018. Saint Petersburg State Forest  
387 Technical University, Saint Petersburg, p. 10 (**in Russian**)  
388 <https://doi.org/10.21266/SPBFTU.2018.KATAEV.1>.
- 389 Baranchikov YN, Seraya LG (2019) The emerald ash borer on the way to Belgorod. Botanic Gardens Conservation  
390 International Russian Division Newsletter 12 (35): 91–94 (**in Russian**)  
391 [https://doi.org/10.25791/cbgcis.12\(35\).976](https://doi.org/10.25791/cbgcis.12(35).976)
- 392 Baranchikov YN, Seraya LG, Grinash MN (2014) All European ash species are susceptible to emerald ash borer  
393 *Agrilus planipennis* Fairmaire (Coleoptera: Buprestidae) – a Far Eastern invader. *Siberian Journal of Forest*  
394 *Science* 6:80–85.
- 395 Chamorro ML, Volkovitch MG, Poland TM, Haack RA, Lingafelter SW (2012) Preimaginal stages of the emerald  
396 ash borer, *Agrilus planipennis* Fairmaire (Coleoptera: Buprestidae): An invasive species of ash trees  
397 (Fraxinus). PLoS ONE. 7(3): e33185. doi:10.1371/journal.pone.0033185.
- 398 Drogvalenko AN, Orlova-Bienkowskaja MJ, Bieńkowski AO (2019) Record of the Emerald Ash Borer (*Agrilus*  
399 *planipennis*) in Ukraine is confirmed. *Insects* 10: 338. <https://doi.org/10.3390/insects10100338>
- 400 Emerald Ash Borer Info (2019) <http://www.emeraldashborer.info>. Accessed 28 June 2019

- 401 EPPO (2019a) Global Database. *Agrilus planipennis* does not occur in Ukraine. EPPO Reporting Service  
402 (2019/156). Available online: <https://gd.eppo.int/reporting/article-6586> Accessed 18 December 2019
- 403 EPPO (2019b) Global Database. Presence of *Agrilus planipennis* confirmed in Ukraine. EPPO Reporting Service  
404 (2019/202) Available online: <https://gd.eppo.int/reporting/article-6632> Accessed 18 December 2019
- 405 EU (2019) Commission Delegated Regulation (EU) 2019/1702 of 1 August 2019 supplementing Regulation (EU)  
406 2016/2031 of the European Parliament and of the Council by establishing the list of priority pests. OJ L  
407 260, 8–10, [http://data.europa.eu/eli/reg\\_del/2019/1702/oj](http://data.europa.eu/eli/reg_del/2019/1702/oj)
- 408 Haack RA, Baranchikov Y, Bauer LS, Poland TM (2015) Emerald ash borer biology and invasion history. In: Van  
409 Driesche RG, Reardon RC (eds) Biology and control of emerald ash borer. FHTET 2014–09. U.S.  
410 Department of Agriculture, Forest Service, Forest Health Technology Enterprise Team, Morgantown, WV,  
411 pp 1–13
- 412 Herms DA (2015) Host range and host resistance. In: Van Driesche RG, Reardon RC (eds) Biology and control of  
413 emerald ash borer. FHTET 2014–09. U.S. Department of Agriculture, Forest Service, Forest Health  
414 Technology Enterprise Team, Morgantown, WV, pp 65–73
- 415 Herms DA, McCullough DG (2014) Emerald ash borer invasion of North America: History, biology, ecology,  
416 impacts, and management. Annual Review of Entomology 59:13–30. [https://doi.org/10.1146/annurev-ento-](https://doi.org/10.1146/annurev-ento-011613-162051)  
417 011613-162051
- 418 Izhevskii SS, Mozolevskaya EG (2010) *Agrilus planipennis* Fairmaire in Moscow ash trees. Russian Journal of  
419 Biological Invasions 1(3):153–155
- 420 Liu HP, Bauer LS, Gao R, Zhao T, Petrice TR, Haack RA (2003) Exploratory survey for emerald ash borer, *Agrilus*  
421 *planipennis* (Coleoptera: Buprestidae) and its natural enemies in China. The Great Lakes Entomologist 36:  
422 191–204
- 423 Meshkova VL (2019) Emerald Ash Borer – newly arriving to our territories. Nauka 6: 8–11. **(in Ukrainian)**
- 424 Mozolevskaya EG (2012) Present important species of dendrophilous insects in urban green plantations of Moscow.  
425 In: Ekologicheskie i ekonomicheskie posledstviya invaziidendrofil'nykh nasekomykh (Ecological and  
426 Economic Consequences of Invasion of Dendrophilous Insects). Inst. Lesa Sib. Otd. Ross. Akad. Nauk,  
427 Krasnoyarsk, pp. 23–24 **(in Russian)**
- 428 Orlova-Bienkowskaja MJ (2014a) Ashes in Europe are in danger: the invasive range of *Agrilus planipennis* in  
429 European Russia is expanding. Biological Invasions 16(7): 1345–1349 [https://doi.org/10.1007/s10530-013-](https://doi.org/10.1007/s10530-013-0579-8)  
430 0579-8
- 431 Orlova-Bienkowskaja MJ (2014b) European range of the emerald ash borer *Agrilus planipennis* (Coleoptera:  
432 Buprestidae) is expanding: the pest destroys ashes in the northwest of Moscow Oblast and in part of Tver  
433 Oblast. Russian Journal of Biological Invasions (Springer) 5(1): 32–37  
434 <https://doi.org/10.1134/S2075111714010081>
- 435 Orlova-Bienkowskaja MJ, Belokobyl'skij SA (2014) Discovery of the first European parasitoid of the emerald ash  
436 borer *Agrilus planipennis* (Coleoptera: Buprestidae). European Journal of Entomology, 111(4): 594–596
- 437 Orlova-Bienkowskaja MJ, Bieńkowski AO (2016) The life cycle of the emerald ash borer *Agrilus planipennis* in  
438 European Russia and comparisons with its life cycles in Asia and North America. Agricultural and Forest  
439 Entomology 18(2): 182–188 <https://doi.org/10.1111/afe.12140>
- 440 Orlova-Bienkowskaja MJ, Bieńkowski AO (2018a) Modeling long-distance dispersal of emerald ash borer in  
441 European Russia and prognosis of spread of this pest to neighboring countries within next 5 years. Ecol  
442 Evol 8: 9295–9304. <https://doi.org/10.1002/ece3.4437>

- 443 Orlova-Bienkowskaja MJ, Bieńkowski AO (2018b) To EAB or not to EAB? It is doubtful that *Agrilus planipennis*  
444 will become a devastating forest pest in Europe in the nearest future. In: Preparing Europe for invasion by  
445 the beetles emerald ash borer and bronze birch borer, two major tree-killing pests, October 1–4, 2018.  
446 Austrian Research Centre for Forests (BFW), Vienna, Abstracts, p. 31 <https://bfw.ac.at/emeraldashborer>
- 447 Orlova-Bienkowskaja MJ, Drovalenko AN, Zabaluev IA, Sazhnev AS, Peregudova EYu, Mazurov SG, Komarov  
448 EV, Bieńkowski AO (2019) Bad and good news for ash trees in Europe: alien pest *Agrilus planipennis* has  
449 spread to the Ukraine and the south of European Russia, but does not kill *Fraxinus excelsior* in the forests.  
450 BioRxiv. [Preprint]. <https://doi.org/10.1101/689240>. Accessed 22 January 2020.
- 451 Orlova-Bienkowskaja MJ, Volkovitsh MG (2014) Range expansion of *Agrilus convexicollis* in European Russia  
452 expedited by the invasion of emerald ash borer, *Agrilus planipennis* (Coleoptera: Buprestidae). Biological  
453 Invasions 17(2): 537–544. <https://doi.org/10.1007/s10530-014-0762-6>
- 454 Orlova-Bienkowskaja MJ, Volkovitsh MG (2018) Are native ranges of the most destructive invasive pests well  
455 known? A case study of the native range of the emerald ash borer, *Agrilus planipennis* (Coleoptera:  
456 Buprestidae). Biological Invasions 20(5): 1275-1286. <https://doi.org/10.1007/s10530-017-1626-7>
- 457 Peregudova EY (2016) The first records of buprestid beetle *Agrilus planipennis* in Tver city and *Agrilus*  
458 *convexicollis* in Tver Oblast. In: Musolin DL, Selikhovkin AV (eds) Dendrobiont invertebrates and fungi  
459 and their role in forest ecosystems. Proceedings of the International Conference. Saint Petersburg (Russia),  
460 November 23–25, 2016. Saint Petersburg State Forest Technical University, Saint Petersburg, p.82 (**in**  
461 **Russian**)
- 462 Peregudova EY (2019) The emerald ash borer focus in Tver City, in the north-western border of the invasive range.  
463 Russian Journal of Biological Invasions 2: 80–86
- 464 Rosselkhoznadzor (2014) Russian National Plant Protection Organization. Rosselkhoznadzor has confirmed the  
465 information about detection of the Emerald Ash Borer in Livny  
466 <http://www.fsvps.ru/fsvps/print/press/68279.html> (**in Russian**). Accessed 26 June 2019
- 467 Rosselkhoznadzor (2019) Russian National Plant Protection Organization. Open Data Russia  
468 <https://data.gov.ru/opendata/7708523530-carantinzone> (**in Russian**). Accessed 27 September 2019
- 469 Showalter DN, Saville RJ, Orton ES, Buggs JJA, Bonello P, Brown JKM (2019) Resistance of European ash  
470 (*Fraxinus excelsior*) saplings to larval feeding by the emerald ash borer (*Agrilus planipennis*). Plants,  
471 People, Planet 00:1–6. <https://doi.org/10.1002/ppp3.10077>
- 472 Straw NA, Williams DT, Kulinich OA, Gninenko YI (2013) Distribution, impact and rate of spread of emerald ash  
473 borer *Agrilus planipennis* (Coleoptera: Buprestidae) in the Moscow region of Russia. Forestry 86:515–522.  
474 <https://doi.org/10.1093/forestry/cpt031>
- 475 Vesti Volgograd (2018) <https://www.youtube.com/watch?v=kV8IHe1Ddc8> (**in Russian**). Accessed 26 June 2019
- 476 Volkovitsh MG, Orlova-Bienkowskaja MJ, Kovalev AV, Bieńkowski AO (2019) An illustrated guide to distinguish  
477 emerald ash borer (*Agrilus planipennis*) from its congeners in Europe. Forestry 1–10.  
478 doi:10.1093/forestry/cpz024.
- 479 Zvyagintsev VB, Baranov OY, Pantelev SV (2015) The prevalence of necrosis of ash branches caused by the  
480 invasive pathogen *Hymenoscyphus fraxineus* Baral et al. in the Moscow Oblast and along the highway M1.  
481 Current Mycology in Russia 5(1), Chapter 10: 413–414 (**in Russian**) <https://doi.org/10.14427/cmr.2015.v.10>
- 482  
483  
484

485 **Tables**

486 **Table 1** Previously published records of *Agrilus planipennis* in European Russia.

| Region         | Locality                                                    | Year of first detection | Sources of information                                                      |
|----------------|-------------------------------------------------------------|-------------------------|-----------------------------------------------------------------------------|
| Moscow reg.    | Moscow<br>( <i>A. planipennis</i> occurs all over the city) | 2003                    | Baranchikov et al. 2008; Izhevskii and Mozolevskaya 2010; Straw et al. 2013 |
| Moscow reg.    | Manikhino                                                   | 2006                    | Baranchikov et al. 2008                                                     |
| Moscow reg.    | Serpukhov                                                   | 2009                    | Baranchikov et al. 2010                                                     |
| Moscow reg.    | Mozhaisk                                                    | 2009                    | Baranchikov et al. 2010                                                     |
| Moscow reg.    | Mytiszhi                                                    | 2009                    | Baranchikov et al. 2010                                                     |
| Moscow reg.    | Pushkino                                                    | 2009                    | Baranchikov and Kurteev 2012                                                |
| Moscow reg.    | Zelenograd                                                  | 2011                    | Orlova-Bienkowskaja 2014b                                                   |
| Moscow reg.    | Kolomna                                                     | 2012                    | Orlova-Bienkowskaja 2014a                                                   |
| Smolensk reg.  | Localities along the Moscow-Vyazma road                     | 2012                    | Baranchikov and Kurteev 2012                                                |
| Moscow reg.    | Sergiev Posad                                               | 2012                    | Baranchikov and Kurteev 2012                                                |
| Ryazan reg.    | Vysokoe                                                     | 2012                    | Baranchikov 2013                                                            |
| Tula reg.      | Shchekino                                                   | 2013                    | Straw et al. 2013                                                           |
| Tver reg.      | Zubstov                                                     | 2013                    | Straw et al. 2013                                                           |
| Tver reg.      | Novozavidovskiy                                             | 2013                    | Straw et al. 2013                                                           |
| Tver reg.      | Emmaus                                                      | 2013                    | Straw et al. 2013                                                           |
| Moscow reg.    | Uzunovo                                                     | 2013                    | Orlova-Bienkowskaja 2014a                                                   |
| Moscow reg.    | Klin                                                        | 2013                    | Orlova-Bienkowskaja 2014b                                                   |
| Moscow reg.    | Staraya Kupavna                                             | 2013                    | Orlova-Bienkowskaja 2014a                                                   |
| Voronezh reg.  | Voronezh                                                    | 2013                    | Orlova-Bienkowskaja 2014a                                                   |
| Tula reg.      | Tula                                                        | 2013                    | Orlova-Bienkowskaja 2014a                                                   |
| Kaluga reg.    | Kaluga                                                      | 2013                    | Orlova-Bienkowskaja 2014a                                                   |
| Tver reg.      | Konakovo                                                    | 2013                    | Orlova-Bienkowskaja 2014b                                                   |
| Orel reg.      | Orel                                                        | 2013                    | Orlova-Bienkowskaja 2014a                                                   |
| Yaroslavl reg. | Yaroslavl                                                   | 2013                    | Orlova-Bienkowskaja 2014a                                                   |
| Tambov reg.    | Michurinsk                                                  | 2013                    | Orlova-Bienkowskaja 2014a                                                   |
| Vladimir reg.  | Petushki                                                    | 2013                    | Baranchikov 2013                                                            |
| Orel reg.      | Livny                                                       | 2013                    | Rosselkhoznadzor 2014                                                       |
| Moscow reg.    | Solnechnogorsk                                              | 2014                    | Orlova-Bienkowskaja and Belokobylskij 2014                                  |
| Moscow reg.    | Planernaya                                                  | 2014                    | Orlova-Bienkowskaja and Bieńkowski 2016                                     |
| Moscow reg.    | Povarovka                                                   | 2014                    | Orlova-Bienkowskaja and Belokobylskij 2014                                  |
| Smolensk reg.  | Semirechje                                                  | 2014                    | Zvyagintsev et al. 2015                                                     |
| Smolensk reg.  | Andreykovo                                                  | 2014                    | Zvyagintsev et al. 2015                                                     |
| Tver reg.      | Khiminstituta settlement                                    | 2015                    | Peregudova 2016                                                             |
| Voronezh reg.  | Talovaya                                                    | 2018                    | Baranchikov et al. 2018a                                                    |

|               |                              |      |                             |
|---------------|------------------------------|------|-----------------------------|
| Lipetsk reg.  | Elets                        | 2018 | Baranchikov et al. 2018a    |
| Smolensk reg. | Smolensk                     | 2018 | Baranchikov and Seraya 2018 |
| Tver reg.     | Doroshiha railway station    | 2018 | Peregudova 2019             |
| Voronezh reg. | Olkhovatskoe<br>Lesnichestvo | 2018 | Rosselkhoznadzor 2019       |
| Bryansk reg.  | Majskij Park                 | 2019 | Rosselkhoznadzor 2019       |
| Belgorod reg. | Roven'ki                     | 2019 | Baranchikov and Seraya 2019 |
| Belgorod reg. | Eriomovka                    | 2019 | Baranchikov and Seraya 2019 |
| Belgorod reg. | Nagorie                      | 2019 | Baranchikov and Seraya 2019 |
| Belgorod reg. | Aidar                        | 2019 | Baranchikov and Seraya 2019 |
| Voronezh reg. | Novobelaya                   | 2019 | Baranchikov and Seraya 2019 |

---

487

488

490 **Table 2.** Surveys of ash trees in Russia, Ukraine and Belarus in 2017-2020. The localities where *Agrilus planipennis* was detected are marked with red. The localities where *A.*  
 491 *planipennis* was not detected are marked with green. New localities of detection are marked with the label "New". Types of plantatings: F – forest, U – urban, M – along the  
 492 motorway, R – along the railway, and B – shelterbelts. Surveys were made by AA – Andrzej A. Bieńkowski, AB – Andrzej O. Bieńkowski, AD – Alexander N. Droghvalenko, AR –  
 493 Alexander B. Ruchin, AS – Alexey S. Sazhnev, AV – Alexey N. Volodchenko, EK – Evgenij V. Komarov, EP – Elena Yu. Peregudova, IZ – Ilya A. Zabaluev, LE – Leonid V.  
 494 Egorov, ML – Mikhail V. Lavrentiev, MO – Marina J. Orlova-Bienkowskaja, PZ – Pavel A. Zavalishin, RI – Roman N. Ishin, SM – Sergey G. Mazurov, TN – Tatyana V. Nikulina,  
 495 VA – Vasilij V. Anikin, VM – Vladimir V. Martynov, and VS – Vitalij V. Struchaev.

| Region         | Locality              | No. examined ash trees<br>( <i>Fraxinus</i> ) |                  | Kind of<br>plantings | Signs of infestation with <i>A.</i><br><i>planipennis</i> | Year of<br>survey | Surveyor |
|----------------|-----------------------|-----------------------------------------------|------------------|----------------------|-----------------------------------------------------------|-------------------|----------|
|                |                       | <i>pennsylvanica</i>                          | <i>excelsior</i> |                      |                                                           |                   |          |
| Russia         |                       |                                               |                  |                      |                                                           |                   |          |
| Belgorod reg.  | Belgorod              | >50                                           | >50              | U & R                | No                                                        | 2019              | VS       |
| Belgorod reg.  | Glukhovka (New)       | 6                                             | –                | M                    | Larval galleries, larvae                                  | 2020              | PZ       |
| Belgorod reg.  | Staryj Oskol          | >100                                          | –                | U                    | No                                                        | 2019              | AA       |
| Bryansk reg.   | Bryansk               | >100                                          | 5                | U                    | Exit holes, larval galleries                              | 2019              | IZ       |
| Chuvashia      | Cheboksary            | >100                                          | –                | U                    | No                                                        | 2017              | LE       |
| Kaluga reg.    | Maloyaroslavets (New) | >100                                          | –                | U                    | Exit holes, larval galleries                              | 2019              | AA       |
| Krasnodar reg. | Krasnodar             | >50                                           | 10               | U                    | No                                                        | 2018              | MO, AB   |
| Krasnodar reg. | Sochi                 | –                                             | >50              | U & F                | No                                                        | 2018              | MO, AB   |
| Kursk reg.     | Kursk (New)           | >20                                           | >30              | U & R                | Exit holes, one dead adult                                | 2019              | VS       |
| Lipetsk reg.   | Leski (New)           | 10                                            | –                | R                    | One live adult                                            | 2019              | SM       |
| Mordovia       | Saransk               | >50                                           | >50              |                      | No                                                        | 2019              | AR       |
| Moscow         | Moscow                | >100                                          | –                | U                    | Live adults, larvae, exit holes                           | 2019              | MO, AB   |
| Moscow reg.    | Dedinovo (New)        | 20                                            | –                | U                    | Live adults, larvae, exit holes                           | 2017              | MO, AB   |
| Moscow reg.    | Kolomna               | >50                                           | –                | U                    | Larvae, exit holes                                        | 2017              | MO, AB   |
| Moscow reg.    | Shakhovskaya (New)    | >100                                          | 2                | U                    | Live adults, larvae, exit holes                           | 2019              | MO, AB   |
| Moscow reg.    | Stupino (New)         | >100                                          | –                | U                    | Exit holes, larval galleries                              | 2017              | MO, AB   |
| Moscow reg.    | Zelenograd            | >100                                          | –                | U                    | Larvae, one dead adult, exit holes                        | 2019              | MO, AB   |
| Pskov reg.     | Sebezh                | –                                             | 122              | U                    | No                                                        | 2019              | MO, AB   |
| Pskov reg.     | Velikie Luki          | >100                                          | >100             | U                    | No                                                        | 2019              | MO, AB   |
| Rostov reg.    | Azov                  | > 50                                          | –                | U & M                | No                                                        | 2019              | TN, VM   |
| Rostov reg.    | Bokovskaya            | > 50                                          | –                | M                    | No                                                        | 2017              | TN, VM   |
| Rostov reg.    | Kamensk-Shakhtinskiy  | > 100                                         | –                | M                    | No                                                        | 2017              | TN, VM   |

|                |                                          |                                          |                                          |       |                                                     |               |            |
|----------------|------------------------------------------|------------------------------------------|------------------------------------------|-------|-----------------------------------------------------|---------------|------------|
| Rostov reg.    | Kashary                                  | > 30                                     | –                                        | M     | No                                                  | 2017          | TN, VM     |
| Rostov reg.    | Millerovo                                | > 50                                     | –                                        | M     | No                                                  | 2017          | TN, VM     |
| Rostov reg.    | Morozovsk                                | > 50                                     | –                                        | M     | No                                                  | 2017          | TN, VM     |
| Rostov reg.    | Razdorskaya                              | > 50                                     | –                                        | M     | No                                                  | 2017          | TN, VM     |
| Rostov reg.    | Rostov-on-Don                            | > 100                                    | 20                                       | U     | No                                                  | 2019          | TN, VM     |
| Rostov reg.    | Shakhty                                  | > 50                                     | –                                        | U & M | No                                                  | 2017          | TN, VM     |
| Rostov reg.    | Taganrog                                 | > 50                                     | –                                        | M     | No                                                  | 2019          | TN, VM     |
| Saratov reg.   | Balashov                                 | >100                                     | >50                                      | U     | No                                                  | 2019          | AV         |
| Saratov reg.   | Saratov                                  | >100                                     | >100                                     | U     | No                                                  | 2019          | ML, VA     |
| Smolensk reg.  | Roslavl                                  | >50                                      | >50                                      | U     | No                                                  | 2019          | IZ         |
| Smolensk reg.  | Sychevka                                 | 22                                       | 8                                        | U     | No                                                  | 2019          | MO, AB     |
| Smolensk reg.  | Vyazma                                   | 107                                      | 67                                       | U     | One dead adult, larvae, exit holes                  | 2019          | MO, AB     |
| St.-Petersburg | St.-Petersburg                           | >100                                     | –                                        | U     | No                                                  | 2018          | MO, AB     |
| Tambov         | Tambov                                   | >50                                      | >50                                      | U     | No                                                  | 2019          | RI         |
| Tula reg.      | Tula                                     | >100                                     | –                                        | U     | Fresh exit holes, traces of adult feeding on leaves | 2019          | IZ         |
| Tula reg.      | Tulskie Zaseki: Krapivna                 | –                                        | >250                                     | F     | No                                                  | 2019          | IZ         |
| Tula reg.      | Tulskie Zaseki: Severno-Odoevskoe Forest | –                                        | >250                                     | F     | No                                                  | 2019          | IZ         |
| Tver reg.      | Bologoye                                 | 53                                       | 5                                        | U     | No                                                  | 2019          | MO, AB     |
| Tver reg.      | Ostashkov                                | 76                                       | 8                                        | U     | No                                                  | 2019          | MO, AB     |
| Tver reg.      | Rzev                                     | 99                                       | –                                        | U     | No                                                  | 2019          | MO, AB     |
| Tver reg.      | Torzhok                                  | 82                                       | 9                                        | U     | No                                                  | 2019          | EP         |
| Tver reg.      | Tver                                     | 134                                      | –                                        | U     | Adults, larvae, exit holes                          | 2019          | EP         |
| Tver reg.      | Vyshniy Volochek                         | 103                                      | 6                                        | U     | No                                                  | 2019          | EP, MO, AB |
| Tver reg.      | Zubtsov                                  | >100                                     | –                                        | U & M | Larvae, exit holes                                  | 2019          | MO, AB     |
| Volgograd reg. | Volgograd (New)                          | >500                                     | –                                        | F     | Adults, larvae, exit holes                          | 2018–<br>2019 | EK         |
| Voronezh reg.  | Borisoglebsk                             | 24 in the city and<br>>100 in the forest | 21 in the city and<br>>500 in the forest | U & F | No                                                  | 2019          | MO, AB     |
| Voronezh reg.  | Kantemirovka (New)                       | >100                                     | –                                        | U & M | Exit holes, larval galleries                        | 2019          | MO, AB     |
| Voronezh reg.  | Povorino                                 | 47                                       | –                                        | U     | No                                                  | 2019          | MO, AB     |
| Voronezh reg.  | Rossosh (New)                            | >100                                     | 1                                        | U & B | Exit holes, larval galleries                        | 2019          | MO, AB     |
| Yaroslavl reg. | Borok                                    | 15                                       | –                                        | U     | No                                                  | 2019          | AS         |
| Belarus        |                                          |                                          |                                          |       |                                                     |               |            |



|              |                          |       |       |         |                    |      |        |
|--------------|--------------------------|-------|-------|---------|--------------------|------|--------|
| Gomel reg.   | Gomel                    | >100  | 1     | U       | No                 | 2019 | AA     |
| Minsk reg.   | Borisov                  | >100  | 5     | U       | No                 | 2017 | MO, AB |
| Minsk reg.   | Stolbtsy                 | >100  | –     | U       | No                 | 2018 | MO, AB |
| Minsk reg.   | Minsk                    | >100  | –     | U       | No                 | 2019 | AS     |
| Mogilev reg. | Mogilev                  | >100  | 21    | U       | No                 | 2018 | MO, AB |
| Mogilev reg. | Krichev                  | >50   | 20    | U       | No                 | 2019 | IZ     |
| Vitebsk reg. | Orsha                    | >100  | 7     | U       | No                 | 2018 | MO, AB |
| Vitebsk reg. | Vitebsk                  | >100  | 11    | U       | No                 | 2018 | MO, AB |
| Ukraine      |                          |       |       |         |                    |      |        |
| Donetsk      | Donetsk                  | >300  | >100  | U, F, M | No                 | 2019 | TN, VM |
| Donetsk reg. | Amvrosievka              | > 300 | > 100 | M, B, F | No                 | 2019 | TN, VM |
| Donetsk reg. | Debal'tsevo              | > 100 | –     | M       | No                 | 2019 | TN, VM |
| Donetsk reg. | Marinovka                | > 50  | –     | M       | No                 | 2019 | TN, VM |
| Donetsk reg. | Novoazovsk               | > 100 | –     | U, B, M | No                 | 2019 | TN, VM |
| Donetsk reg. | Starobeshevo             | > 100 | –     | M & B   | No                 | 2019 | TN, VM |
| Donetsk reg. | Uspenka                  | > 100 | –     | M       | No                 | 2019 | TN, VM |
| Kharkiv reg. | Kharkiv                  | >50   | >50   | U       | No                 | 2019 | AD     |
| Luhansk reg. | Starokozhiv Forest (New) | >100  | >100  | B & F   | Larvae, exit holes | 2019 | AD     |
| Luhansk reg. | Alchevsk                 | > 100 | –     | M       | No                 | 2019 | TN, VM |
| Luhansk reg. | Antratsit                | > 100 | –     | U, R, M | No                 | 2019 | TN, VM |
| Luhansk reg. | Chervonopartizansk       | > 100 | –     | M       | No                 | 2019 | TN, VM |
| Luhansk reg. | Dolzhanskoe              | > 100 | –     | M       | No                 | 2019 | TN, VM |
| Luhansk reg. | Izvarino                 | > 100 | –     | M       | No                 | 2019 | TN, VM |
| Luhansk reg. | Kolpakovo                | –     | > 300 | F       | No                 | 2019 | TN, VM |
| Luhansk reg. | Krasnodon                | > 100 | > 50  | U, M    | No                 | 2019 | TN, VM |
| Luhansk reg. | Krasnyj Kut              | > 100 | –     | U, M    | No                 | 2019 | TN, VM |
| Luhansk reg. | Krasnyj Luch             | > 100 | –     | M       | No                 | 2019 | TN, VM |
| Luhansk reg. | Luhansk                  | > 100 | –     | U, F, M | No                 | 2019 | TN, VM |
| Luhansk reg. | Lutugino                 | > 100 | –     | M       | No                 | 2019 | TN, VM |
| Luhansk reg. | Orehovo                  | > 100 | > 20  | M, F    | No                 | 2019 | TN, VM |
| Luhansk reg. | Pershovzanovka           | > 50  | > 10  | M, F    | No                 | 2019 | TN, VM |
| Luhansk reg. | Sverdlovsk               | > 100 | > 20  | U, M    | No                 | 2019 | TN, VM |
| Luhansk reg. | Zelenopol'e              | > 100 | –     | M       | No                 | 2019 | TN, VM |

496

497 **Captions of figures**

498

499 **Fig. 1** Range of *Agrilus planipennis* in European Russia (R) and Ukraine (U) in 2020. The red dots indicate the  
500 localities where *A. planipennis* was detected. The green squares indicate the localities where it was not detected  
501 during surveys in 2017-2019. The black circle indicates the localities of the surveys of *Fraxinus excelsior* in the  
502 broad-leaved Tulske Zaseki Forest. BR – Bryansk region (R), BE – Belgorod (R), KA – Kaluga region (R), LI –  
503 Lipetsk region (R), LU – Luhansk region (U), MO – Moscow region (R), OR – Orel region (R), RY – Ryazan  
504 region (R), SM – Smolensk region (R), TA – Tambov region (R), TU – Tula region (R), TV – Tver region (R), VG  
505 – Volgograd region (R), VL – Vladimir region (R), VO – Voronezh region (R), and YA – Yaroslavl region (R). The  
506 sources are shown in Tables 1 and 2.

507

508 **Fig. 2** Results of the surveys in the eastern part of Ukraine (U) and the neighboring regions of Russia (R). The red  
509 dots indicate the localities where we detected *A. planipennis* in 2017-2019. The green squares indicate the localities  
510 where *A. planipennis* was not detected during surveys in 2017-2019. BE – Belgorod region (R), DO – Donetsk  
511 region (U), KH – Kharkiv region (U), LU – Luhansk region (U), RO – Rostov region (R), and VO – Voronezh  
512 region (R).

513

514 **Fig. 3** *Fraxinus pennsylvanica* tree heavily damaged by *Agrilus planipennis* in Vyazma, Russia in June 2019.  
515 Symptoms of general decline: dieback of the upper part of the stem and epicormic shoots. Photo by M.J. Orlova-  
516 Bienkowskaja.

517

518 **Fig. 4** Adults of *A. planipennis* and their exit holes.

519 **a.** Adults of *Agrilus planipennis* in pupal cells on *Fraxinus pennsylvanica* in Volgograd, Russia in 2018. Photo by  
520 E.V. Komarov.

521 **b.** Exit hole of *Agrilus planipennis* on *Fraxinus pennsylvanica* in Volgograd, Russia in 2018. Photo by E.V.  
522 Komarov.

523 **c.** Dead adult *Agrilus planipennis* found in Kursk in its exit hole on *Fraxinus pennsylvanica* in July 2019. Photo by  
524 V.V. Struchaev.

525 **d.** Adult of *Agrilus planipennis* on a leaf of *Fraxinus pennsylvanica* in Volgograd, Russia in 2018. Photo by E.V.  
526 Komarov.

527

528 **Fig. 5** Larvae and larval galleries of *Agrilus planipennis* in *Fraxinus pennsylvanica* in the Luhansk region of  
529 Ukraine in September 2019. Photo by A.N. Droghvalenko.

530

531

532

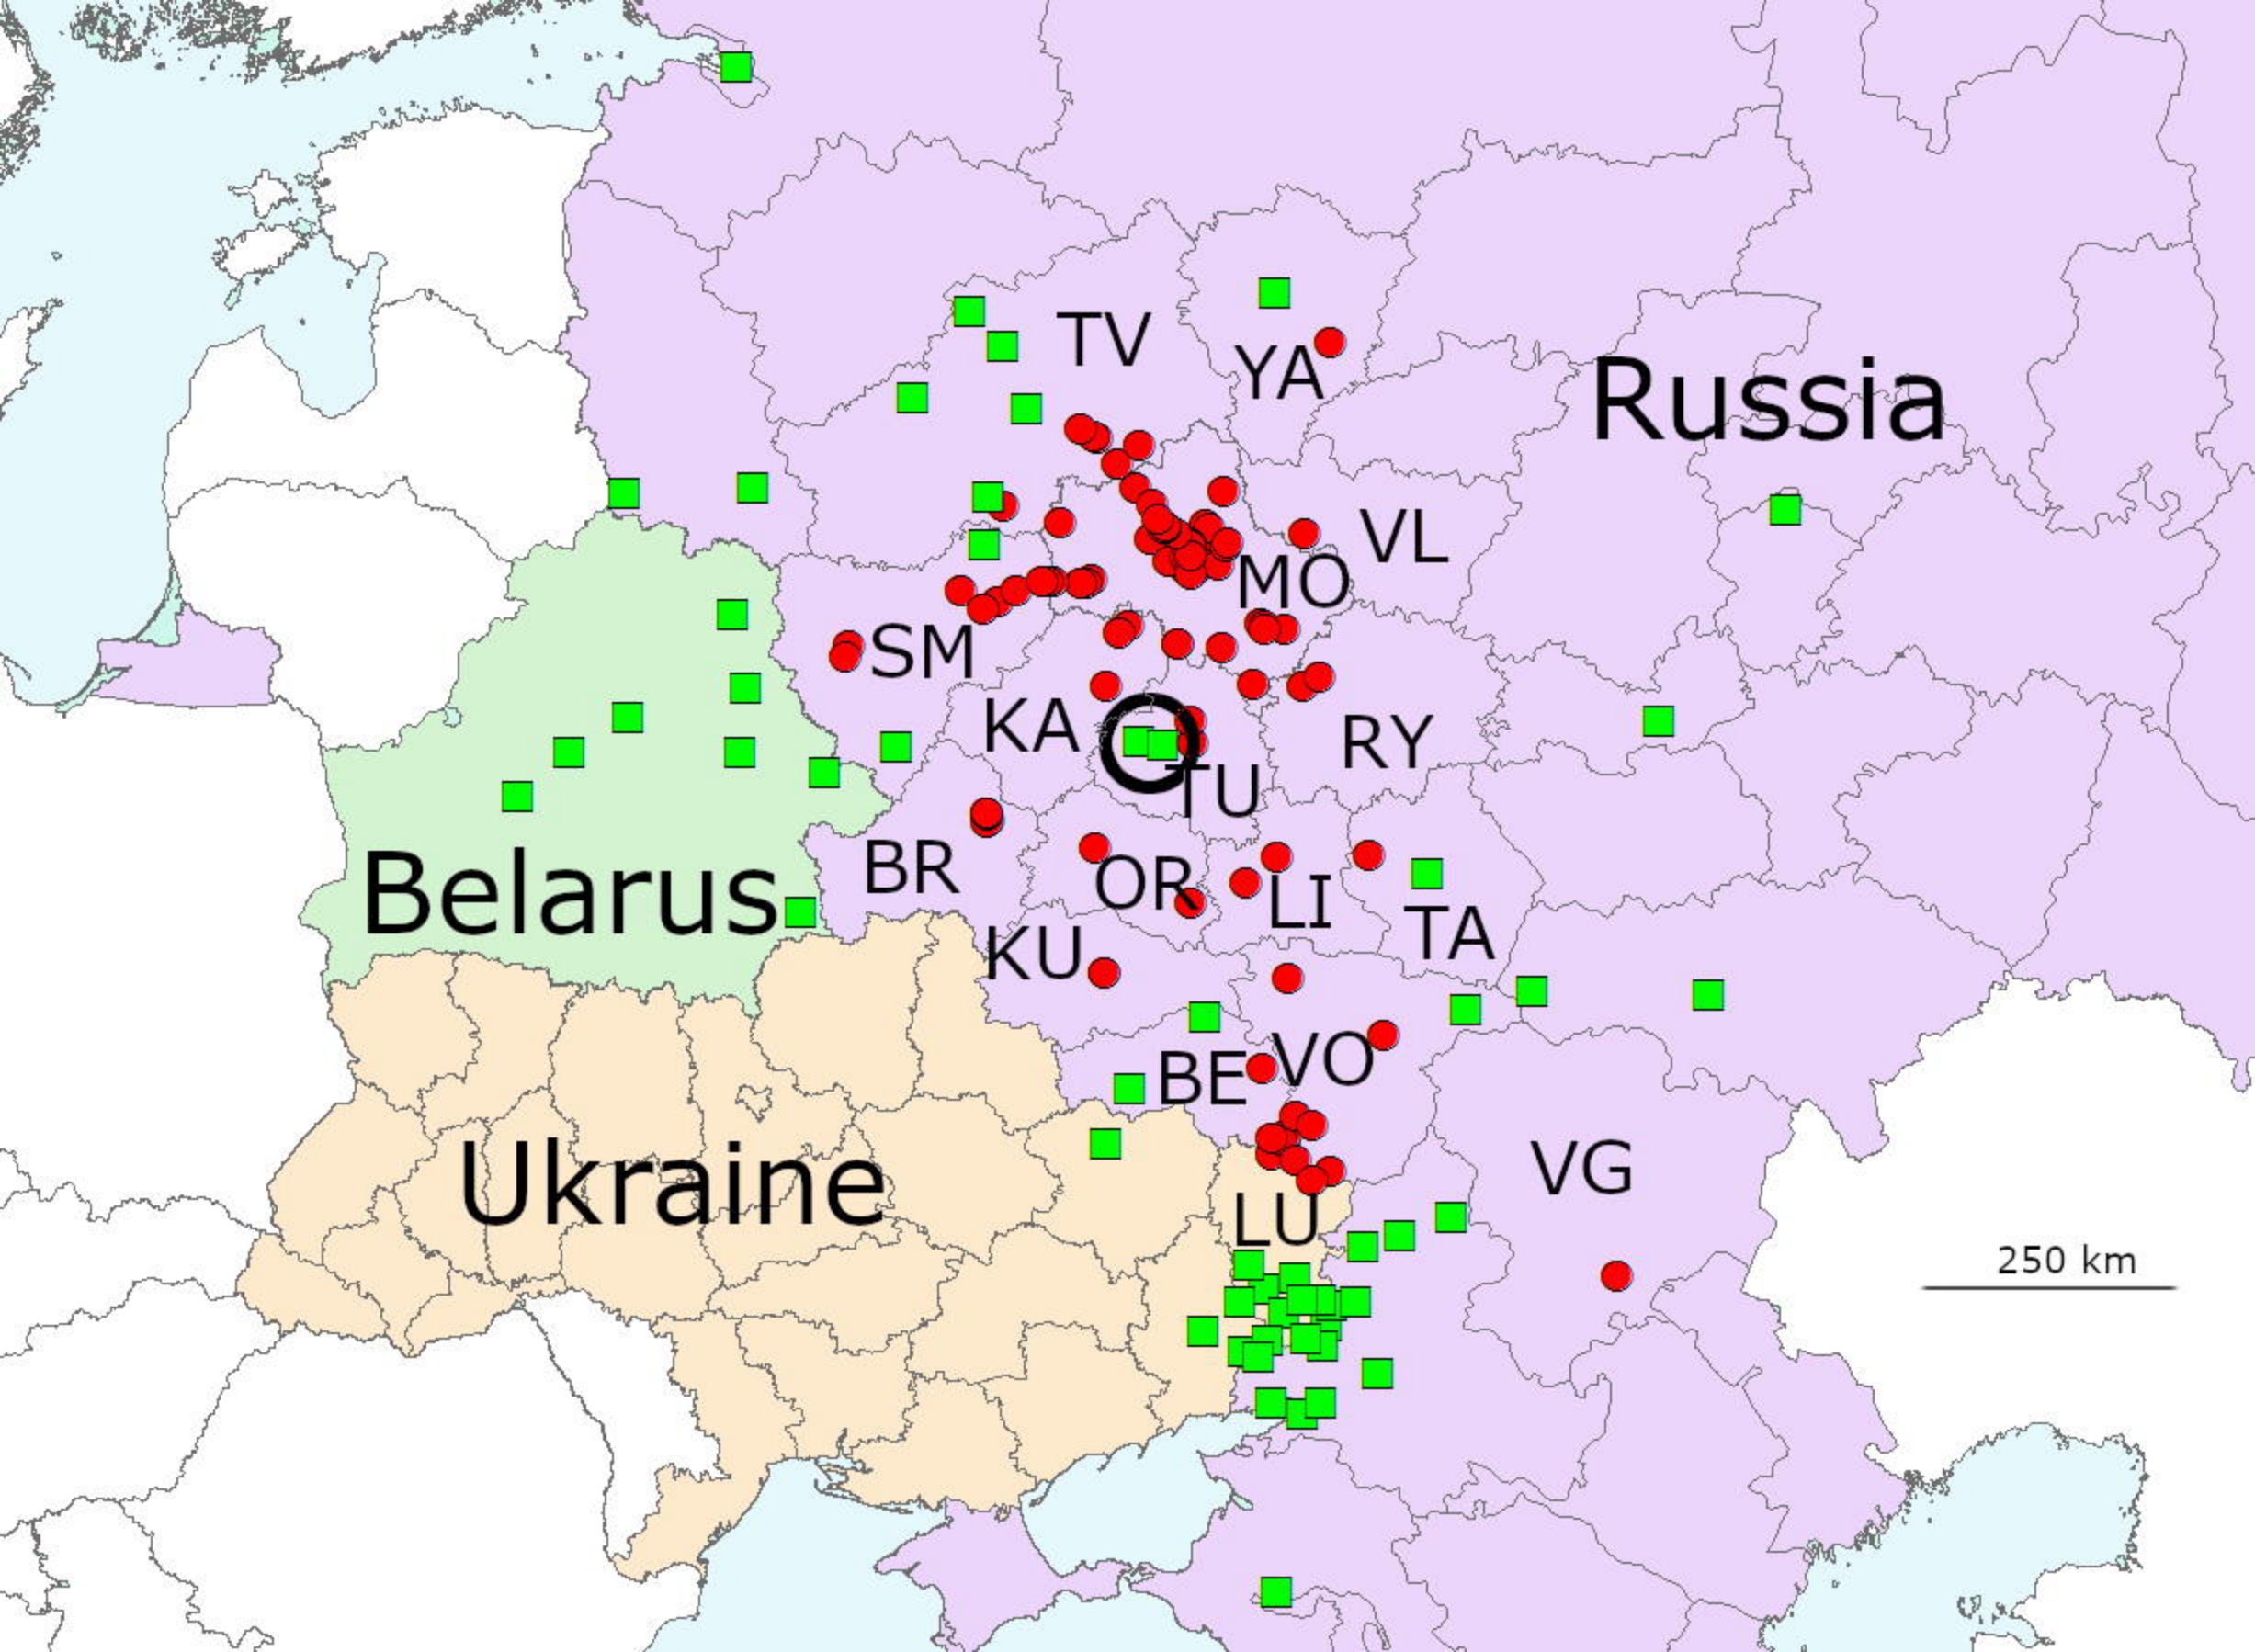

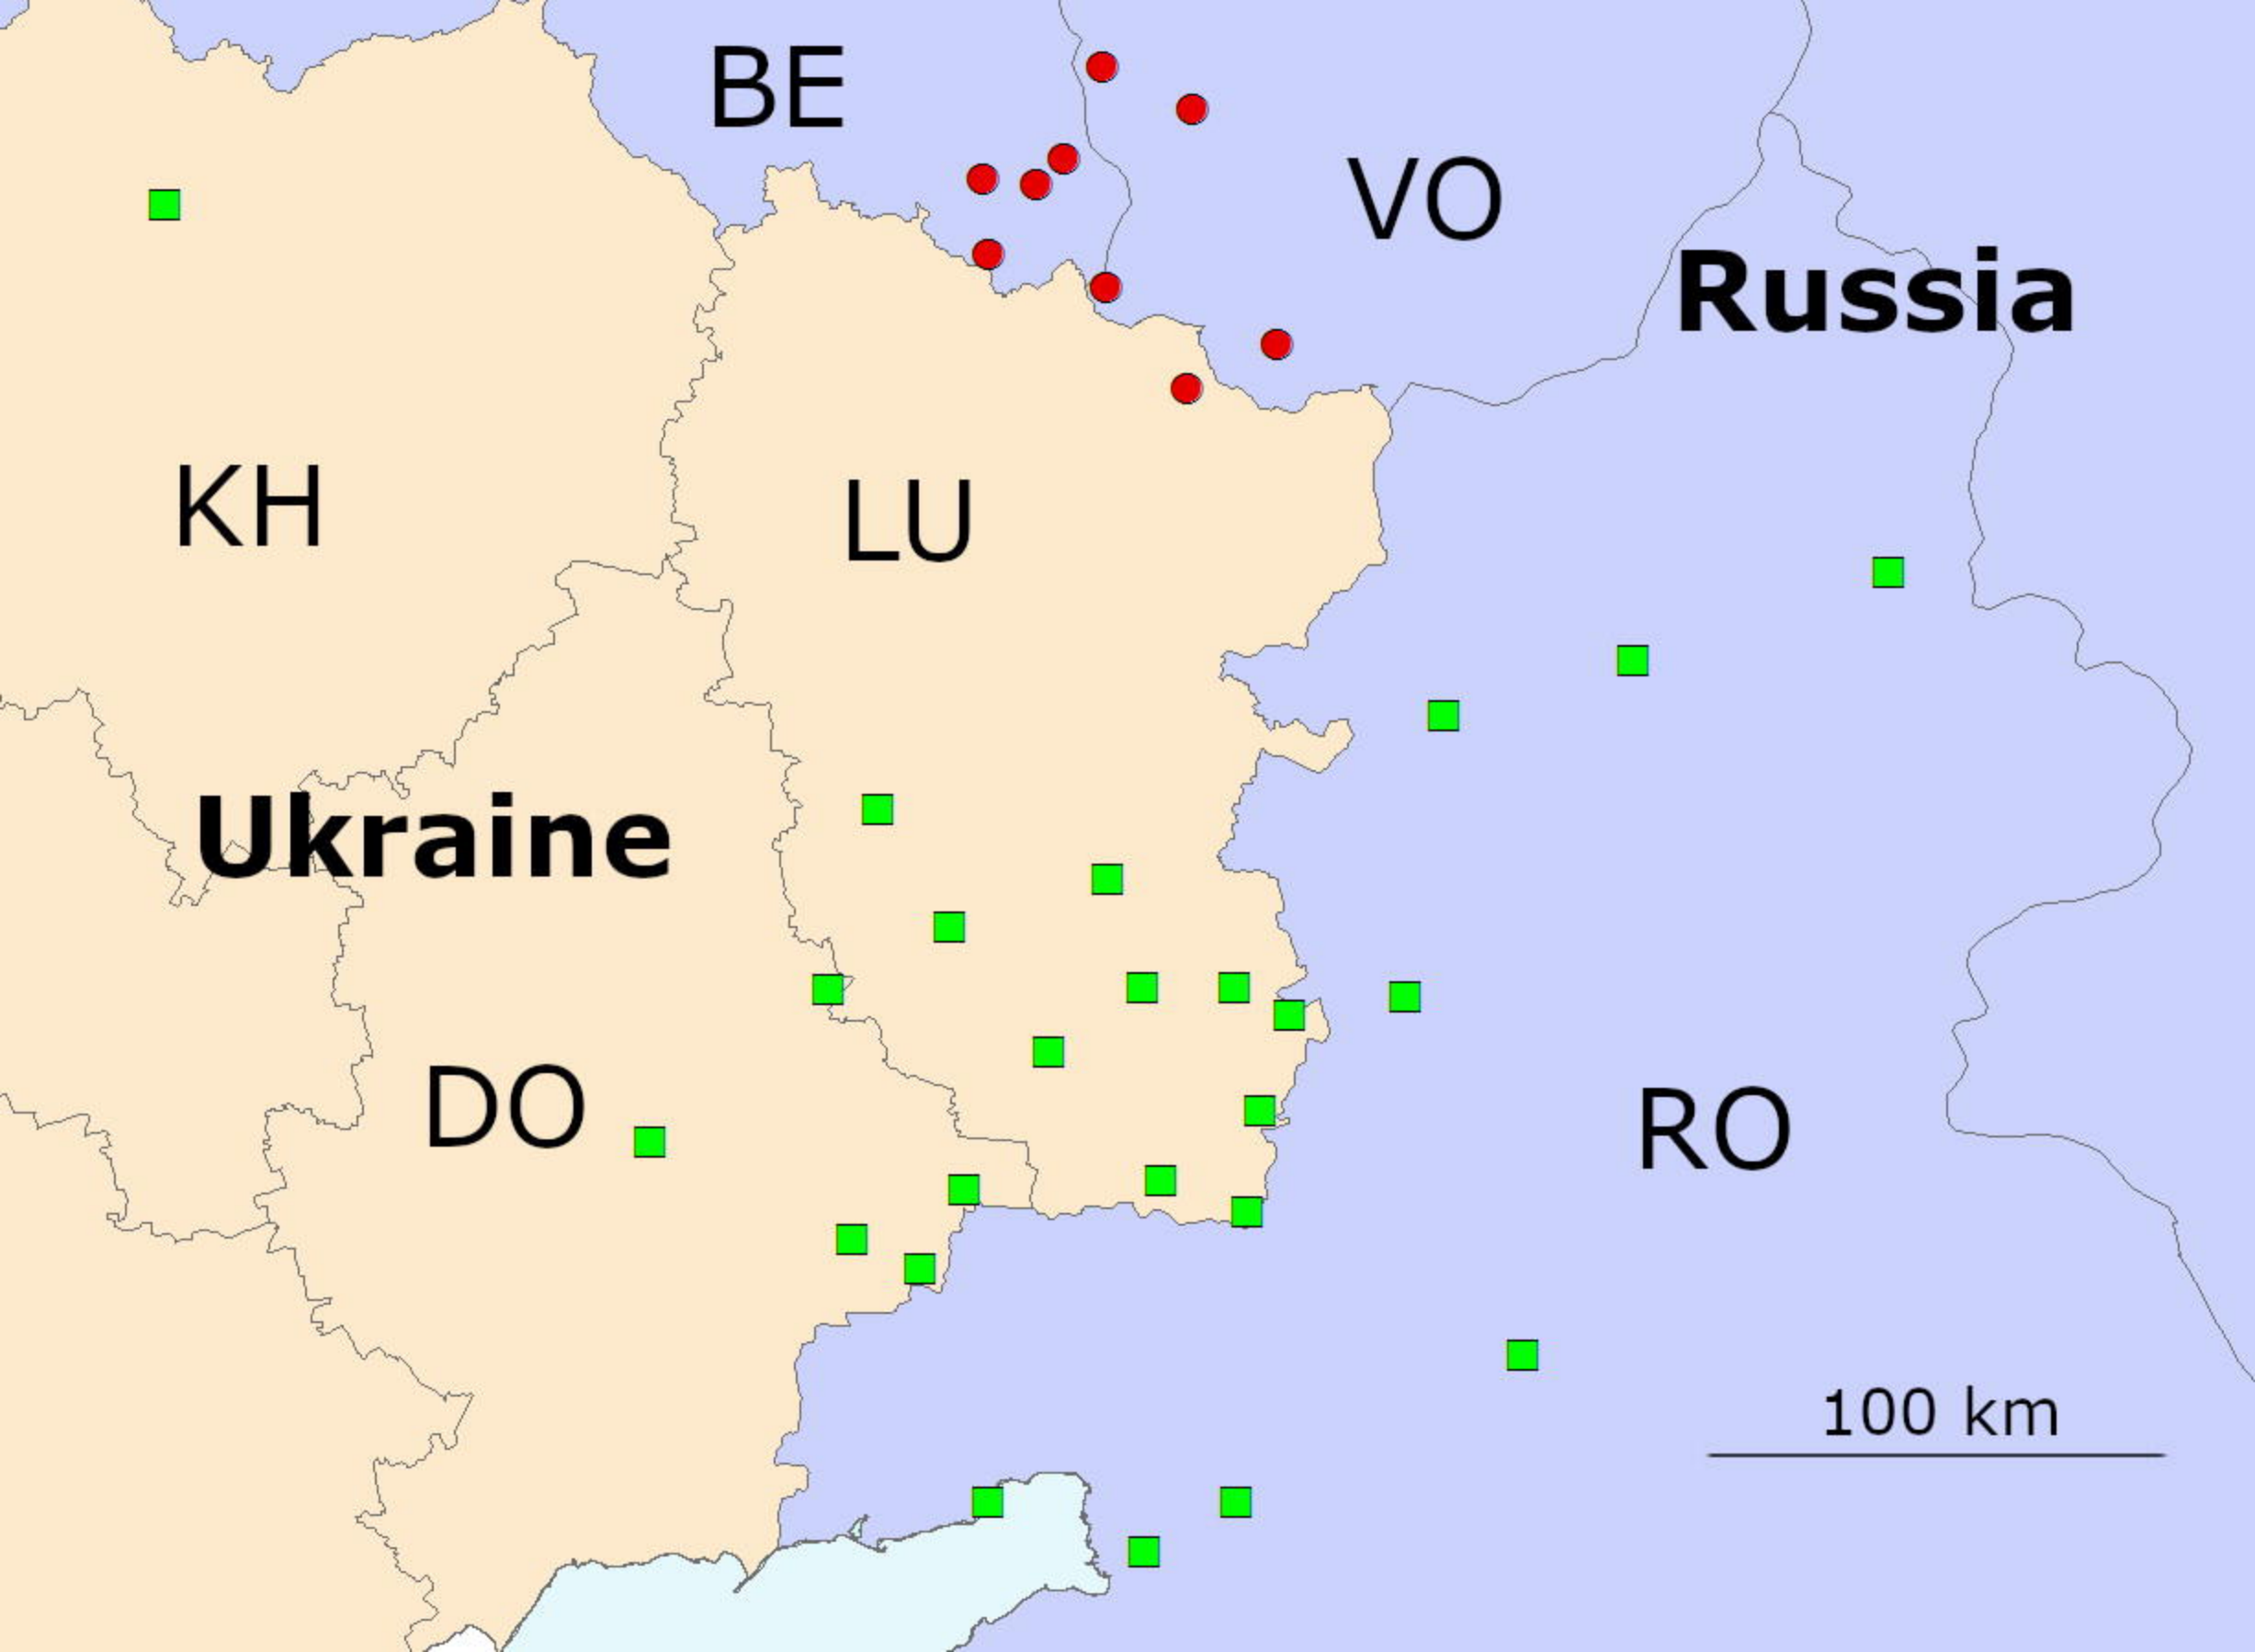

BE

VO

**Russia**

KH

LU

**Ukraine**

DO

RO

100 km

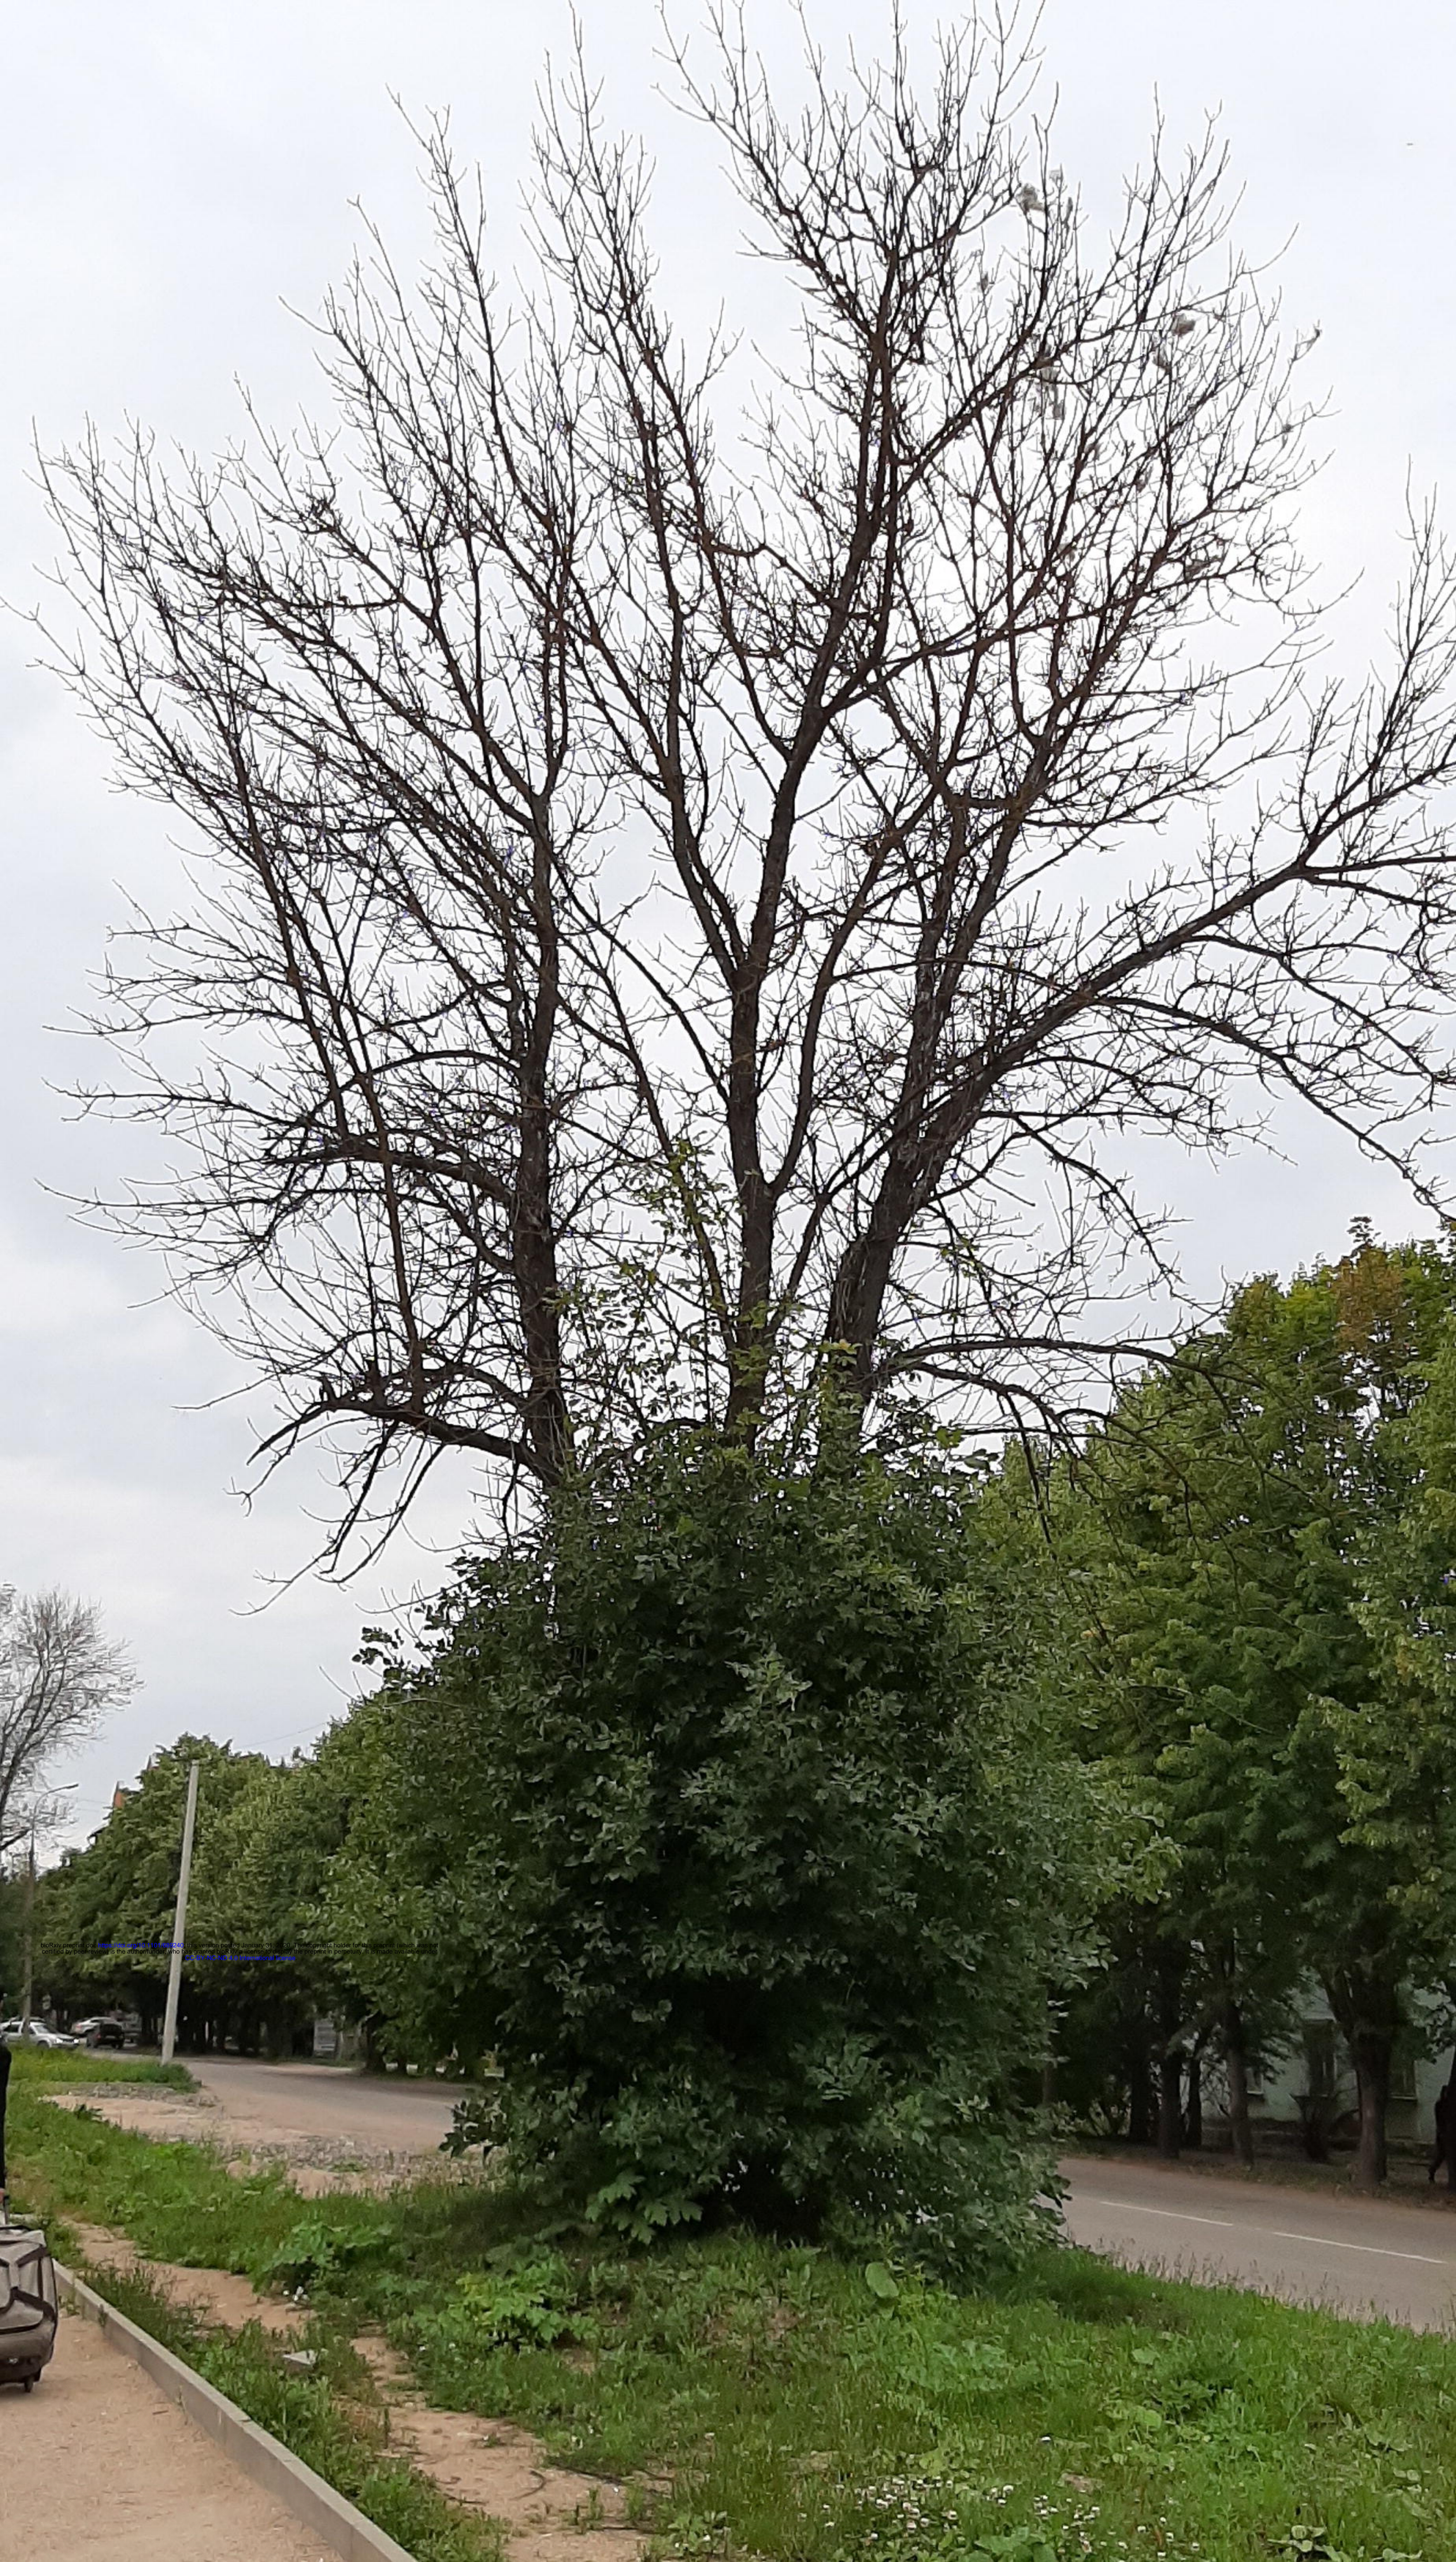

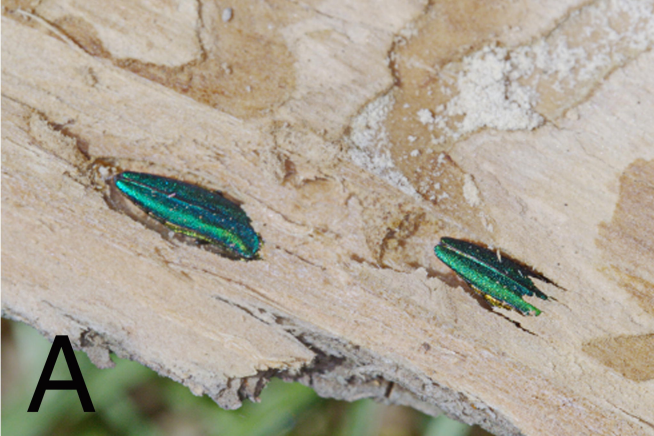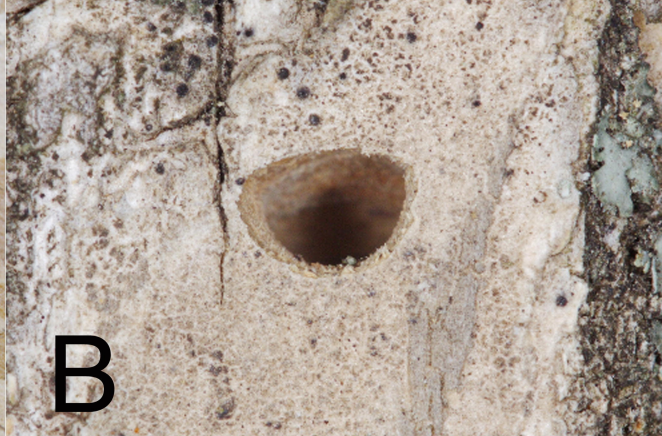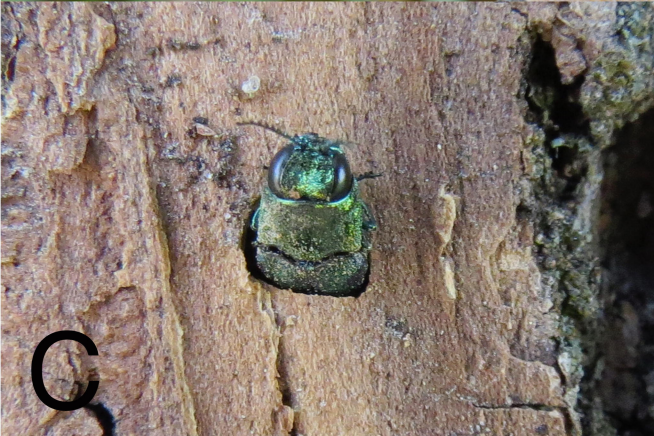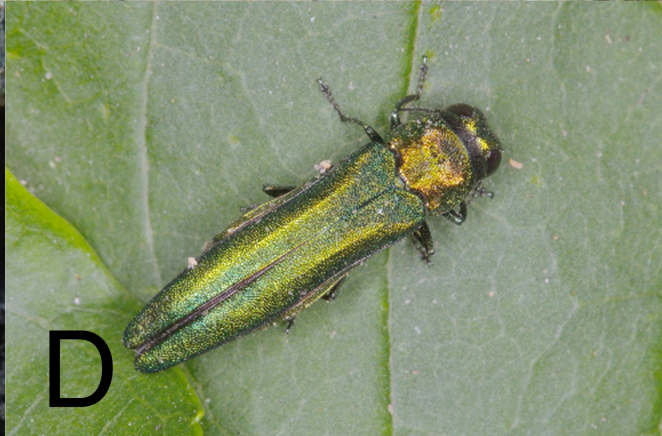

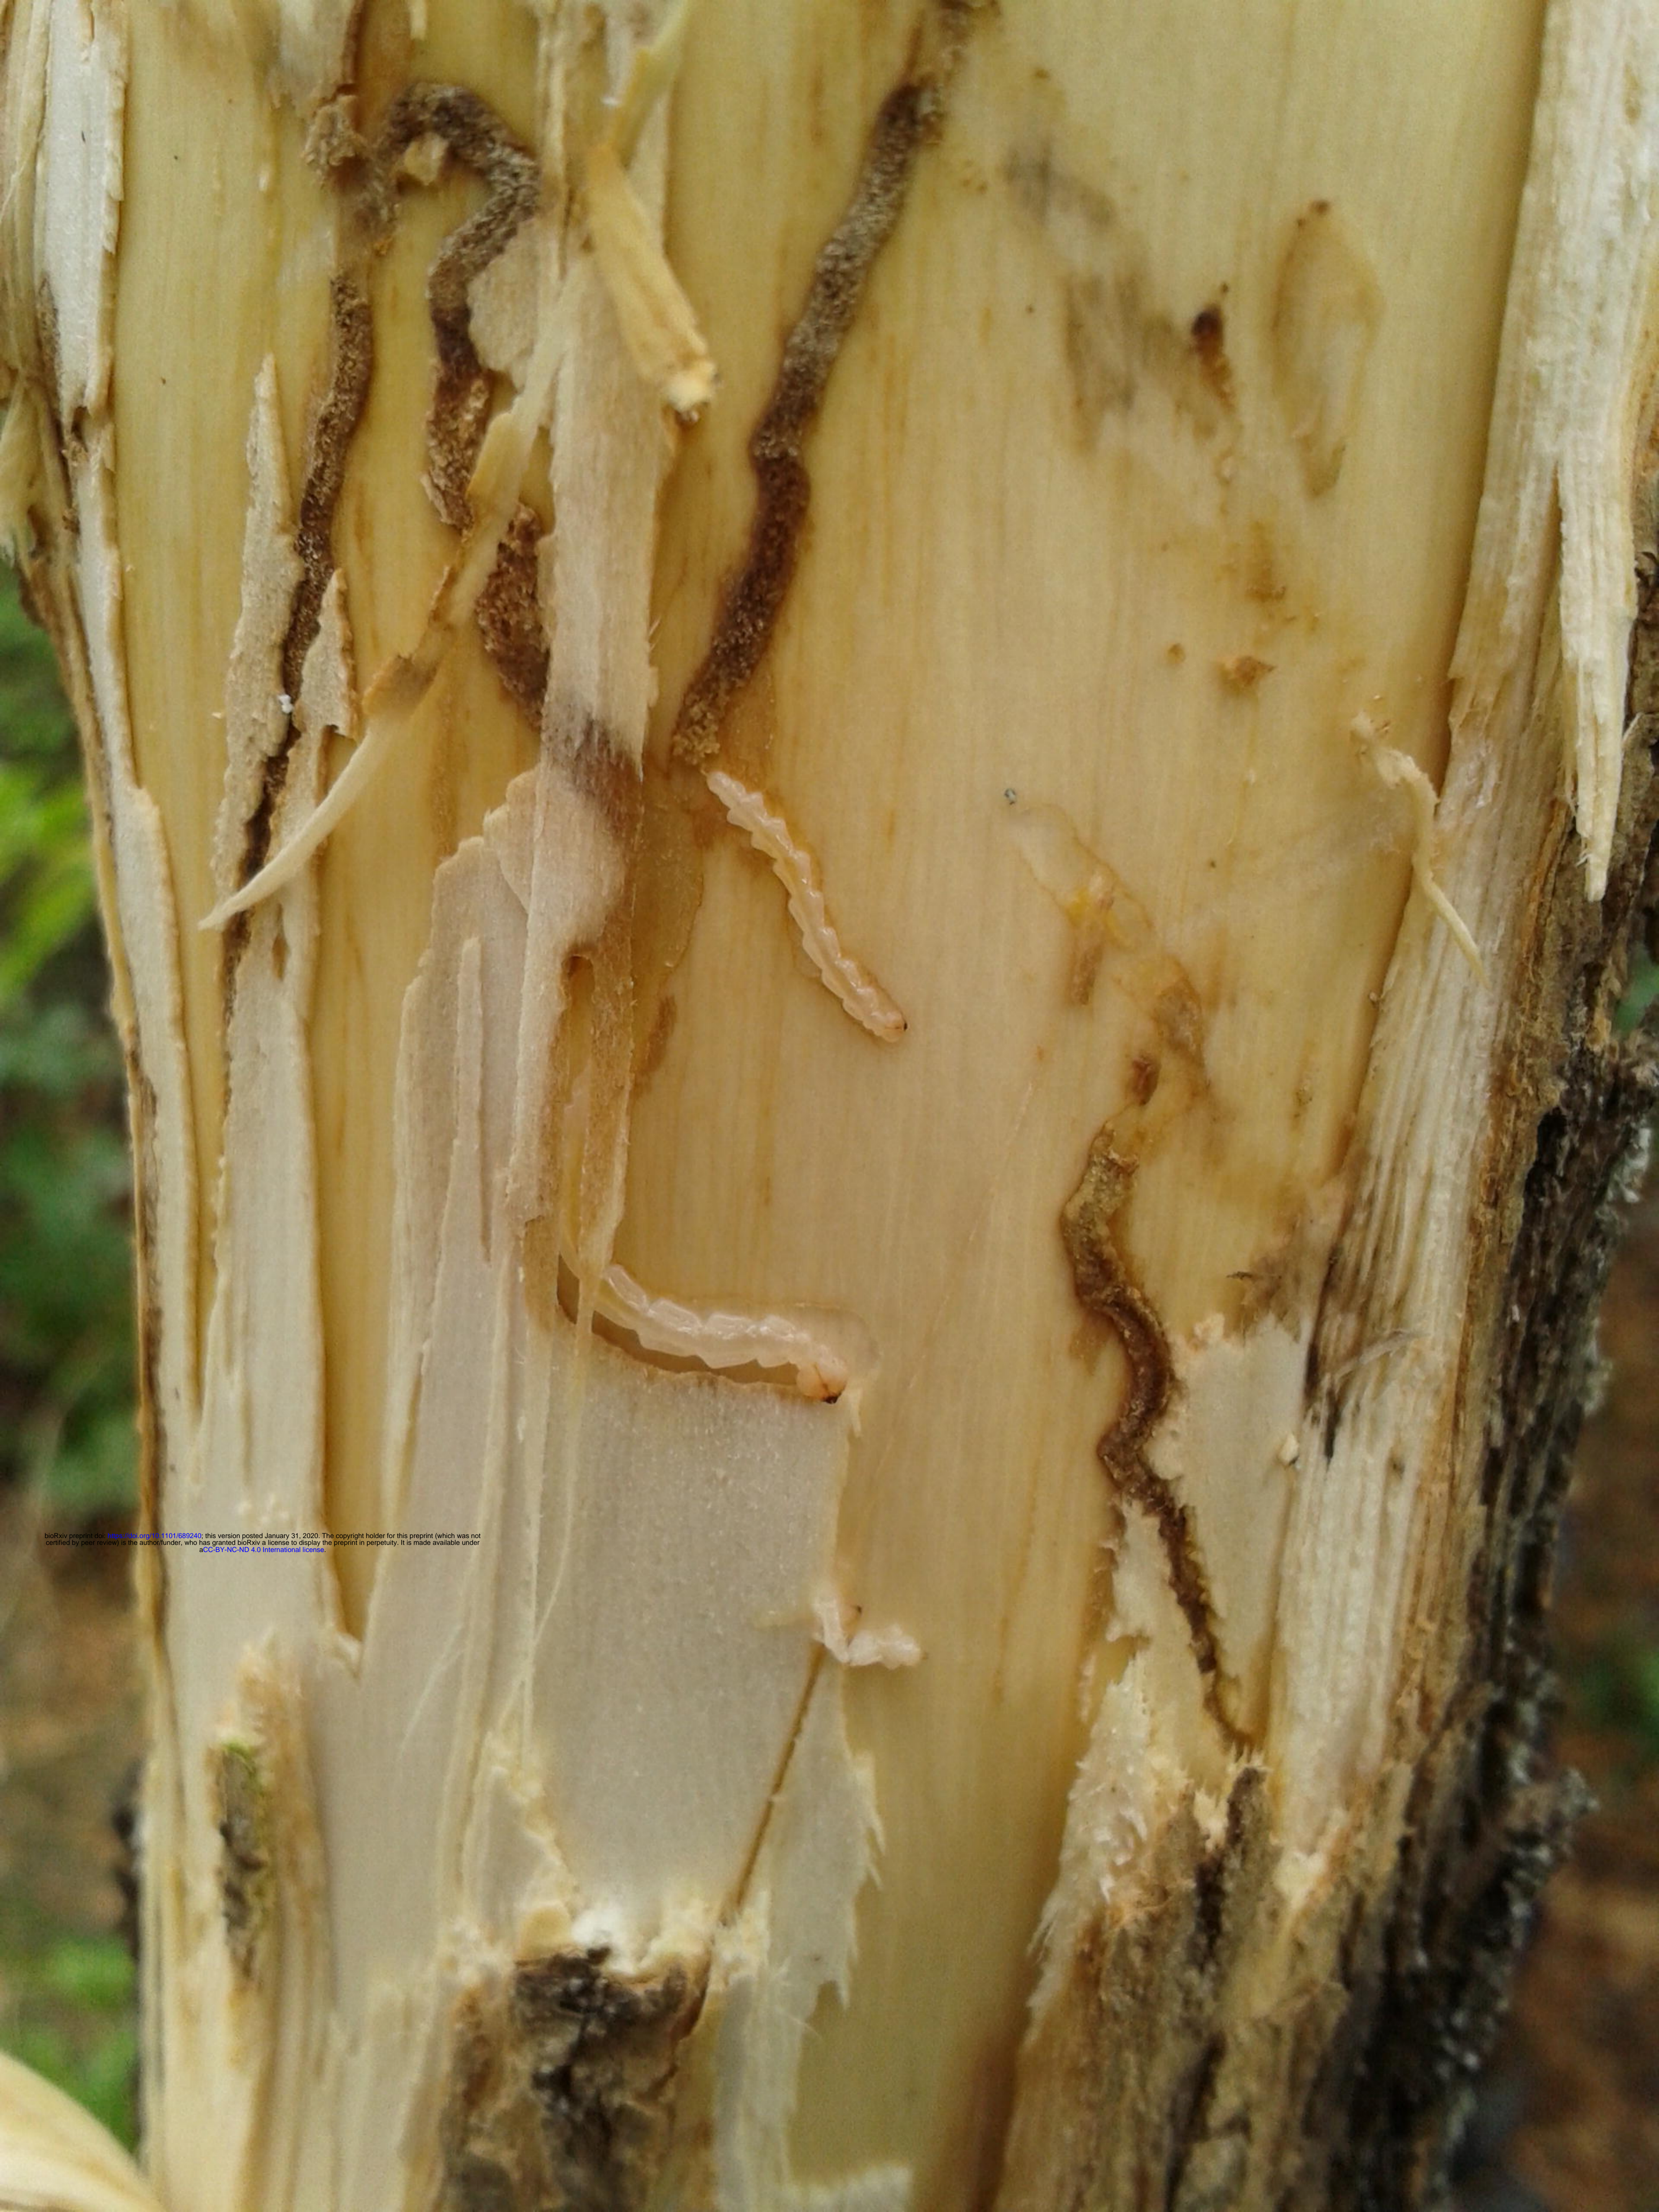

Source: https://www.biorxiv.org/content/10.1101/689240v3.full.pdf
